# Supplementary material for: In vivo analysis reveals that ATP-hydrolysis couples remodeling to SWI/SNF release from chromatin
Source: eLife journal article supplement (doi:10.7554/elife.69424), 2021-07-27

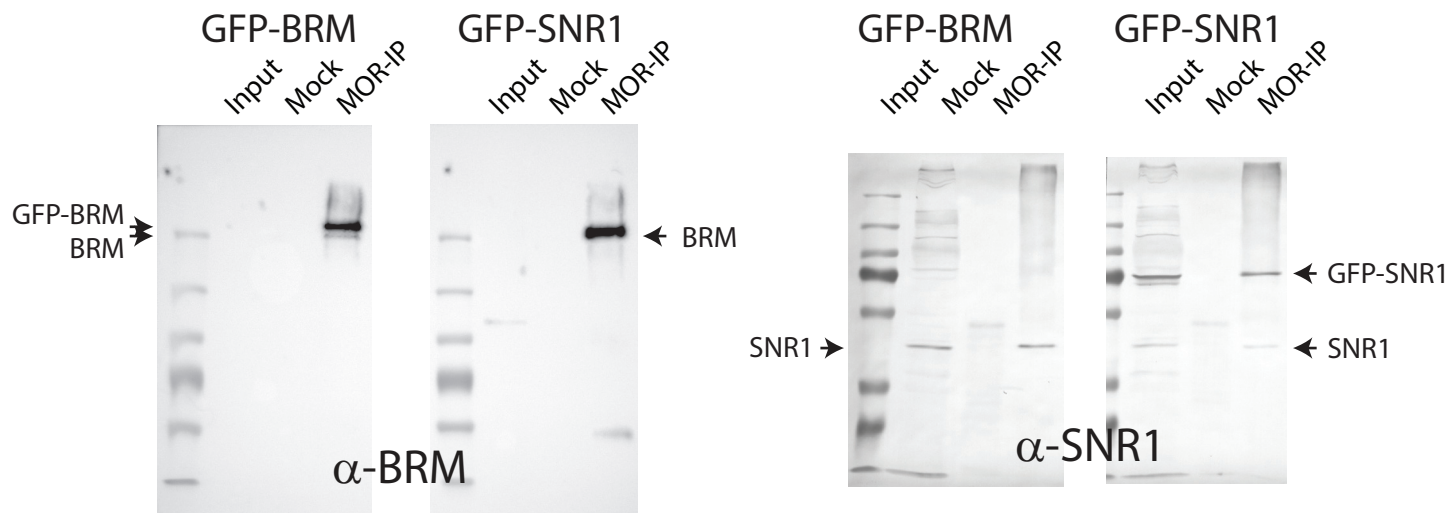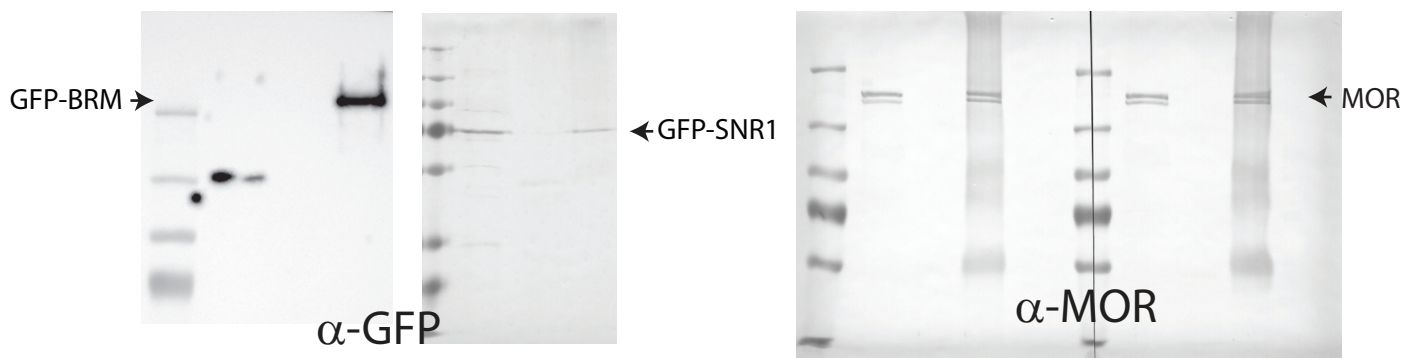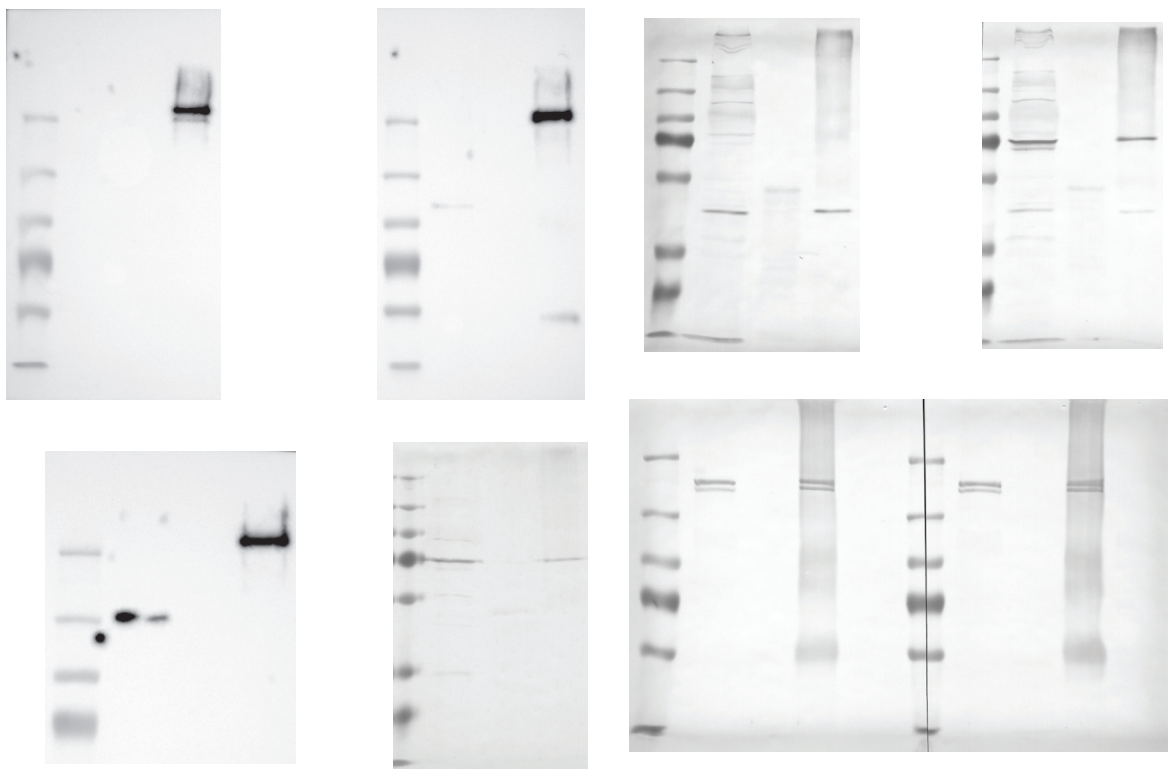

Supplement: fig1-figsupp1-data1 [file elife-69424-fig1-figsupp1-data1-v2.pdf]
