# Supplementary material for: In vivo analysis reveals that ATP-hydrolysis couples remodeling to SWI/SNF release from chromatin
Source: eLife. 2021 Jul 27;10:e69424. doi: 10.7554/eLife.69424 (PMC8352592; doi:10.7554/eLife.69424)
Supplement: Figure 1—source data 1. [file elife-69424-fig1-data1.xlsx]

## Sheet: Series04
Bin procedure GFP histone images: Series 04
															Series							slice 2
	Count
	Value	Slice 2	Slice 3	Slice 4	Slice 5	Slice 6	Slice 7	Slice 8	Slice 9	Slice 10					Count	%						Count	%
	0	0	40	286	516	2325	4893	8533	18121	4
	1	0	549	2523	3711	11641	24307	5245	7533	100			Background		2181881					Background		189162
	2	35	0	3981	4804	9128	14026	5950	7875	230
	3	0	1094	0	6014	9094	12464	6053	7751	542			Interband		1265659	59.2766				Interband		82482	65.7358
	4	0	0	5450	6691	8469	10846	6239	7658	959
	5	119	1872	6921	0	0	9440	6261	7348	1399			Low Intensity		778355	36.4539				Low Intensity		36416	29.0225
	6	0	2797	0	7136	7984	8183	0	6857	0
	7	335	0	7648	7379	7270	7086	6061	6581	2045			High Intesity		91161	4.26949				High Intesity		6577	5.24168
	8	0	3595	7979	7133	6636	6174	5863	5988	2397
	9	0	0	8238	7058	5946	5460	5431	5658	2946					2135175	100						125475	100
	10	661	4268	0	6936	0	4797	5293	5136	3276
	11	0	0	8132	0	5498	4275	4762	4803	3543
	12	1147	5099	7891	6408	5156	3715	0	4238	0
	13	0	5539	0	6233	4677	3219	4634	4124	3788			Summary									Slice 3
	14	0	0	7545	5902	4227	2925	4140	3639	3911		Series		Interband		Low int.		High int.
	15	1743	5749	7253	5655	0	2752	3934	3420	4032												Count	%
	16	0	0	6860	0	3864	2479	3613	3130	3921		4		59		36		4
	17	2521	6256	0	5387	3604	2246	3388	2877	3803		12		57		38		5		Background		242457
	18	0	0	6447	5215	3373	2164	3216	2663	0		14		58		38		4
	19	0	6572	6124	5083	3158	2027	0	2483	3719		17		50		45		5		Interband		132772	60.0395
	20	3385	6528	0	5168	0	2007	2939	2288	3611		19		54		40		6
	21	0	0	6019	4940	3090	1960	2841	2169	3280		21		48		45		7		Low Intensity		79490	35.9454
	22	4183	6610	5746	0	2936	1889	2706	2120	3211		23		48		46		6
	23	0	0	0	4945	2946	1781	2443	1868	3145		25		47		48		5		High Intesity		8879	4.01509
	24	0	6613	5744	5033	2791	1835	2421	1812	0		32		50		44		6
	25	5081	0	5731	4946	0	1900	0	1794	2938		34		45		49		6				221141	100
	26	0	6779	5472	5130	2940	2049	2362	1686	2774
	27	6001	6804	0	0	2995	2079	2296	1605	2602		Mean		51.6		42.9		5.4
	28	0	0	5642	5035	3031	2028	2276	1671	2496		SD		4.75815		4.32319		0.916515
	29	0	6859	5502	5031	3150	2037	2165	1495	2346												Slice 4
	30	6598	0	0	5170	0	2128	2133	1473	0
	31	0	6607	5549	5192	3173	2290	0	1435	2362												Count	%
	32	7264	0	5437	4935	3313	2329	2069	1455	2248
	33	0	6718	5603	0	3441	2410	2076	1450	2139										Background		291414
	34	0	6627	0	5021	3616	2421	1936	1444	2093
	35	7745	0	5505	4865	0	2429	2083	1420	1914										Interband		171285	62.5831
	36	0	6517	5683	4854	3699	2544	2017	1390	0
	37	8132	0	0	4827	3741	2531	2036	1390	1899										Low Intensity		91974	33.6049
	38	0	6394	5468	0	3931	2648	0	1382	1788
	39	0	0	5444	4860	3917	2602	2111	1381	1740										High Intesity		10433	3.81195
	40	8424	6306	0	4738	0	2640	2051	1372	1676
	41	0	6228	5293	4542	4082	2809	2142	1447	1602												273692	100
	42	8652	0	5202	4518	4203	2755	2118	1494	0
	43	0	6202	5180	4408	4129	2757	2149	1377	1613
	44	0	0	0	0	4226	2844	0	1370	1491
	45	8780	6011	5016	4327	0	2753	2210	1438	1516												Slice 5
	46	0	0	4841	4074	4223	2845	2246	1340	1431
	47	8638	5835	0	4078	4352	2863	2221	1407	1396												Count	%
	48	0	5938	4902	4038	4232	2902	2295	1404	0
	49	0	0	4761	4004	4271	2898	2293	1415	1338										Background		307289
	50	8656	5757	4504	0	0	2904	2399	1438	1371
	51	0	0	0	3902	4322	2753	0	1406	1253										Interband		177734	61.0141
	52	8592	5555	4475	3896	4167	2830	2381	1500	1214
	53	0	5465	4243	3817	4198	2930	2430	1416	1167										Low Intensity		101556	34.863
	54	0	0	0	3722	4130	2966	2372	1494	0
	55	8474	5372	4208	0	0	2959	2470	1409	1169										High Intesity		12010	4.1229
	56	0	0	4033	3532	4106	2959	2450	1485	1115
	57	8217	5324	3940	3545	3983	3013	0	1468	1076												291300	100
	58	0	0	0	3435	3986	3059	2468	1501	1086
	59	0	5147	3932	3473	3976	2972	2449	1489	1041
	60	7877	4902	3800	3387	0	3018	2564	1489	0
	61	0	0	0	0	4024	3014	2431	1486	995												Slice 6
	62	7621	4804	3743	3474	3997	2979	2505	1493	977
	63	0	0	3707	3419	3928	3003	0	1476	920												Count	%
	64	0	4572	0	3262	3838	3136	2600	1533	923
	65	7341	0	3600	3301	0	2936	2503	1500	915										Background		289721
	66	0	4748	3516	0	3808	3106	2480	1484	888
	67	6915	4613	3453	3325	3813	3064	2511	1472	0										Interband		190688	57.3065
	68	0	0	0	3292	3864	3144	2584	1434	893
	69	0	4408	3374	3282	3750	3146	2475	1455	880										Low Intensity		128311	38.5607
	70	6689	0	3370	3200	0	3232	0	1503	801
	71	0	4237	0	3217	3713	3093	2600	1478	812										High Intesity		13752	4.13282
	72	6286	0	3364	0	3652	3192	2550	1486	798
	73	0	4173	3396	3244	3787	3279	2655	1498	0												332751	100
	74	0	4188	3362	3235	3738	3295	2592	1503	676
	75	6358	0	0	3160	0	3371	2635	1485	797
	76	0	4202	3381	3141	3752	3348	0	1478	768												Slice 7
	77	5884	0	3309	0	3877	3388	2611	1498	720
	78	0	3971	0	3268	3815	3424	2560	1582	766												Count	%
	79	0	0	3252	3187	3747	3350	2632	1526	0
	80	5456	4057	3168	3287	0	3408	2593	1500	729										Background		308618
	81	0	3956	0	3162	3661	3440	2702	1507	667
	82	5352	0	3266	3184	3611	3466	2717	1514	708										Interband		224781	70.3597
	83	0	3822	3333	0	3773	3387	0	1521	672
	84	0	0	3328	3267	3710	3415	2741	0	669										Low Intensity		90897	28.4521
	85	5144	3849	0	3140	0	3420	2704	1537	0
	86	0	0	3458	3168	3674	3535	2714	1535	670										High Intesity		3796	1.1882
	87	4896	3824	3446	3100	3767	3499	2740	1494	628
	88	0	3716	0	3213	3650	3491	2734	1538	648												319474	100
	89	0	0	3389	0	3676	3571	0	1539	591
	90	4635	3767	3364	3301	0	3498	2734	1523	578
	91	0	0	3463	3203	3657	3572	2709	1583	0
	92	4530	3488	0	3401	3650	3626	2728	1534	567												Slice 8
	93	0	0	3434	3253	3623	3533	2757	1522	617
	94	0	3669	3491	0	3647	3529	2819	1570	593												Count	%
	95	4258	3672	0	3370	0	3613	0	1589	548
	96	0	0	3607	3277	3654	3521	2748	1585	562										Background		218170
	97	4021	3632	3659	3267	3669	3525	2689	1542	0
	98	0	0	0	3365	3608	3531	2684	1555	565										Interband		153081	51.313
	99	0	3665	3578	3231	3576	3507	2684	1555	536
	100	3875	0	3606	0	0	3469	2707	1617	549										Low Intensity		130445	43.7254
	101	0	3512	3731	3322	3707	3551	2747	1600	512
	102	3741	3467	0	3340	3684	3617	0	1589	553										High Intesity		14802	4.96165
	103	0	0	3642	3331	3658	3638	2750	1590	0
	104	0	3558	3669	3306	3704	3602	2723	1522	534												298328	100
	105	3448	0	0	0	0	3609	2731	1622	548
	106	0	3589	3733	3291	3704	3637	2664	1615	522
	107	3446	3591	3784	3355	3675	3580	2693	1563	510
	108	0	0	3809	3307	3696	3611	0	1578	489												Slice 9
	109	0	3572	0	3381	3668	3615	2771	1568	0
	110	3252	0	3829	3422	0	3495	2738	1615	514												Count	%
	111	0	3641	3817	0	3603	3641	2686	1698	473
	112	3105	0	0	3369	3732	3539	2700	1630	506										Background		213661
	113	0	3409	3765	3450	3663	3547	2659	1632	462
	114	0	3600	3829	3440	3573	3644	2653	1663	489										Interband		104739	50.1328
	115	3038	0	3880	3465	0	3468	0	1660	0
	116	0	3515	0	0	3700	3549	2768	1630	495										Low Intensity		94653	45.3052
	117	2794	0	3865	3399	3687	3573	2748	1546	477
	118	0	3618	3883	3293	3622	3423	2739	1637	519										High Intesity		9531	4.56197
	119	0	0	0	3448	3625	3587	2753	1714	481
	120	2732	3557	3781	3340	0	3476	2732	1787	531												208923	100
	121	0	3516	3855	3456	3547	3536	0	1672	0
	122	2701	0	0	0	3583	3424	2863	1726	456
	123	0	3410	3917	3349	3596	3380	2867	1724	471
	124	0	0	3807	3426	3551	3506	2784	1639	470
	125	2608	3386	3846	3318	0	3441	2865	1624	460
	126	0	0	0	3413	3610	3574	2877	1606	442
	127	0	3451	3837	0	3627	3482	0	0	0
	128	2442	3493	3840	3339	3584	3383	2868	1706	418
	129	0	0	0	3314	3471	3311	2934	1647	442
	130	2477	3388	3844	3360	0	3309	2735	1685	472
	131	0	0	3748	3221	3637	3499	2855	1721	487
	132	0	3365	3727	3262	3576	3247	2802	1686	459
	133	2441	0	0	0	3584	3245	2828	1686	467
	134	0	3364	3725	3305	3603	3273	0	1659	0
	135	2373	3220	3672	3303	0	3194	2861	1700	450
	136	0	0	0	3267	3558	3249	2932	1779	442
	137	0	3411	3636	3283	3616	3141	2888	1725	472
	138	2252	0	3687	3274	3500	3208	2842	1745	440
	139	0	3259	0	0	3433	3100	2886	1692	444
	140	2183	0	3536	3178	0	3075	0	1786	0
	141	0	3210	3558	3340	3379	3170	2789	1655	444
	142	0	3187	3522	3150	3399	3045	2967	1732	463
	143	2158	0	0	3175	3474	3007	2868	1741	469
	144	0	3137	3319	0	3392	2957	2971	1721	453
	145	1971	0	3429	3077	0	2846	2868	1694	451
	146	0	3129	0	3030	3319	2871	2870	1766	0
	147	0	0	3338	3026	3325	2900	0	1747	495
	148	1961	3113	3269	3053	3289	2764	2914	1677	422
	149	0	2914	3272	3039	3282	2822	2831	1692	453
	150	1962	0	0	0	0	2766	2888	1674	463
	151	0	2960	3302	2896	3313	2699	2898	1719	475
	152	0	0	3170	2945	3234	2725	2835	1712	0
	153	1915	3013	0	2791	3246	2486	0	1727	412
	154	0	2720	2987	2934	3366	2493	2942	1772	451
	155	1779	0	2965	0	0	2462	2813	1696	458
	156	0	2828	2931	2904	3216	2333	2843	1649	449
	157	0	0	0	2759	3184	2286	2800	1681	429
	158	1745	2821	2986	2740	3185	2382	2868	1663	0
	159	0	0	2762	2569	3087	2346	0	1718	430
	160	1749	2647	0	2680	0	2203	2793	1561	469
	161	0	2606	2788	0	3069	2202	2818	1649	450
	162	0	0	2752	2474	3058	2064	2737	1682	415
	163	1649	2659	0	2577	3020	2096	2753	1670	451
	164	0	0	2669	2554	3037	2038	2775	1602	0
	165	1654	2649	2587	2365	0	1997	2806	1609	423
	166	0	0	2526	0	2965	2022	0	1618	421
	167	0	2500	0	2368	2899	1869	2638	1630	407
	168	1618	2379	2513	2298	2947	1817	2650	1606	379
	169	0	0	2328	2177	2870	1744	2650	1587	404
	170	1476	2430	0	2269	0	1720	2557	0	0
	171	0	0	2295	2221	2846	1690	2637	1580	390
	172	0	2260	2312	0	2705	1660	0	1557	429
	173	1460	0	2189	1980	2732	1559	2513	1533	367
	174	0	2299	0	1986	2592	1498	2490	1501	431
	175	1409	2266	2177	1955	0	1450	2506	1476	399
	176	0	0	2103	2027	2702	1514	2476	1510	0
	177	0	2111	0	1944	2539	1435	2437	1488	388
	178	1333	0	2017	0	2498	1412	2362	1458	389
	179	0	2104	1920	1853	2461	1370	0	1473	373
	180	1325	0	0	1805	0	1311	2316	1513	473
	181	0	1927	1883	1755	2411	1163	2317	1427	400
	182	0	2018	1852	1667	2317	1230	2388	1310	0
	183	1291	0	1731	0	2374	1138	2372	1353	388
	184	0	1913	0	1643	2241	1096	2135	1388	404
	185	1253	0	1655	1621	0	1095	0	1436	368
	186	0	1812	1573	1580	2158	974	2143	1329	389
	187	0	0	0	1481	2152	988	2169	1370	378
	188	1158	1725	1622	1401	2191	959	2056	1300	0
	189	0	1707	1467	0	1992	949	2061	1349	386
	190	1138	0	1498	1430	0	871	1926	1234	377
	191	0	1679	0	1418	1918	804	0	1274	374
	192	0	0	1329	1362	1929	849	1853	1287	386
	193	1026	1565	1330	1321	1856	766	1860	1176	384
	194	0	0	0	0	1818	775	1802	1170	414
	195	1012	1461	1244	1211	0	761	1831	1236	0
	196	0	1531	1166	1257	1789	706	1702	1183	348
	197	0	0	0	1178	1682	668	1802	1143	387
	198	954	1461	1165	1211	1661	605	0	1036	358
	199	0	0	1112	1092	1633	611	1726	1086	343
	200	904	1385	1108	0	0	573	1654	1147	362
	201	0	0	0	1081	1521	592	1590	1092	0
	202	0	1258	1035	1034	1510	548	1553	1037	365
	203	909	1249	1016	1019	1452	537	1470	961	353
	204	0	0	0	948	1446	483	0	938	362
	205	847	1132	964	0	0	457	1522	1016	375
	206	0	0	895	950	1324	454	1464	931	350
	207	0	1083	876	914	1321	464	1377	918	0
	208	823	1102	0	883	1231	421	1329	910	361
	209	0	0	831	883	1215	392	1295	855	343
	210	822	1023	792	816	0	398	1263	881	321
	211	0	0	0	0	1143	347	0	812	320
	212	0	978	734	782	1154	338	1174	776	341
	213	750	0	709	736	1049	371	1192	819	0
	214	0	882	685	754	1042	367	1118	809	301
	215	693	848	0	695	0	332	1067	728	319
	216	0	0	674	701	996	306	1078	753	333
	217	0	851	638	0	910	279	0	738	332
	218	653	0	0	645	890	278	1040	680	296
	219	0	736	630	664	882	283	981	686	0
	220	556	0	592	621	0	250	992	625	339
	221	0	710	0	576	831	270	896	636	321
	222	0	608	600	0	805	238	835	602	321
	223	553	0	497	539	718	227	0	588	326
	224	0	680	520	577	696	213	780	622	310
	225	476	0	0	537	0	198	864	558	0
	226	0	662	492	534	724	210	761	526	316
	227	0	0	445	491	703	197	746	545	313
	228	498	568	0	0	651	195	680	507	318
	229	0	548	443	487	622	188	697	494	300
	230	439	0	436	457	0	162	0	476	279
	231	0	552	392	435	587	131	650	471	0
	232	0	0	0	448	601	161	625	435	300
	233	424	515	374	0	544	159	611	415	276
	234	0	0	387	420	508	130	543	395	261
	235	383	452	0	367	0	146	498	356	301
	236	0	432	358	340	497	115	0	336	263
	237	0	0	372	360	448	103	522	327	0
	238	364	411	0	357	473	128	478	311	265
	239	0	0	314	0	413	102	456	304	268
	240	339	361	297	314	0	92	424	275	252
	241	0	0	291	325	354	103	405	271	227
	242	0	356	0	357	379	94	392	234	234
	243	338	356	315	302	370	98	0	221	0
	244	0	0	293	0	352	73	380	224	222
	245	295	288	0	281	0	86	351	227	238
	246	0	0	255	289	280	84	349	200	248
	247	0	283	266	242	294	64	306	177	278
	248	273	0	237	248	314	71	291	182	237
	249	0	303	0	246	293	49	0	156	0
	250	234	261	260	0	0	62	294	136	246
	251	0	0	250	210	288	76	256	112	239
	252	0	237	0	185	257	61	228	107	220
	253	198	0	220	244	238	44	218	101	226
	254	0	196	199	227	217	50	224	95	220
	255	2316	2098	3537	3307	3345	364	2553	357	4834

## Sheet: Series12
Bin procedure GFP histone images: Series 12
															Series							Slice 2
	Count
	Value	Slice 2	Slice 3	Slice 4	Slice 5	Slice 6	Slice 7	Slice 8	Slice 9	Slice 10					Count	%						Count	%
	0	2	320	519	501	426	106	1	0	0
	1	272	5408	8172	5676	4464	2318	43	0	0			Background		2217095					Background		156630
	2	916	8365	9129	8064	7090	0	0	37	2
	3	1977	10389	9161	9778	0	5394	233	0	0			Interband		1355984	57.2174				Interband		42977	40.5367
	4	0	11545	8859	10280	8483	8230	0	148	8
	5	2946	12242	8375	9866	9009	0	618	0	0			Low Intensity		901038	38.0204				Low Intensity		39241	37.0128
	6	4111	12045	8023	0	9273	10002	1367	406	0
	7	5215	11099	7701	9274	0	10874	0	0	44			High Intesity		112859	4.76222				High Intesity		23802	22.4505
	8	0	10219	7014	8005	9176	0	2160	764	0
	9	6039	9014	6619	7062	8705	10816	0	0	132					2369881	100						106020	100
	10	6666	7997	5986	5980	7994	10563	2995	1334	0
	11	7228	6893	5701	5257	0	0	3877	0	0
	12	0	6131	4994	0	7590	9975	0	1891	320
	13	7349	5564	4697	4708	7004	0	4311	0	0												Slice 3
	14	7474	0	0	4276	6661	9560	0	2547	620			Summary
	15	7391	4907	4388	4003	0	8911	4895	0	0		Series		Interband		Low int.		High int.				Count	%
	16	0	4494	3961	3723	6390	0	5228	3282	0
	17	7059	4191	3828	3668	6194	8220	0	0	1091		4		59		36		4		Background		256618
	18	6538	3718	3683	0	5954	8151	5475	3784	0		12		57		38		5
	19	6048	3529	3394	3668	0	0	0	0	1664		14		58		38		4		Interband		153943	56.04
	20	0	3095	3371	3562	5977	7715	5944	4471	0		17		50		45		5
	21	5697	2994	3281	3720	5965	7715	0	0	0		19		54		40		6		Low Intensity		108505	39.4992
	22	5159	2853	3130	3586	6370	0	6058	5060	2148		21		48		45		7
	23	4606	2603	3267	3654	0	7646	6427	0	0		23		48		46		6		High Intesity		12254	4.46083
	24	0	2527	3212	0	6509	7648	0	5434	2857		25		47		48		5
	25	4210	2345	3194	3792	6395	0	6523	0	0		32		50		44		6				274702	100
	26	3810	2182	3175	4060	6712	7533	0	0	0		34		45		49		6
	27	3431	2159	3058	4248	0	0	6707	5938	3600
	28	0	0	0	4256	6634	7542	6836	0	0		Mean		51.6		42.9		5.4
	29	3146	2001	3010	4392	6790	7874	0	6079	4164		SD		4.75815		4.32319		0.916515				Slice 4
	30	2835	1954	3067	4443	6683	0	6858	0	0
	31	2585	2029	2983	0	0	7809	0	6310	0												Count	%
	32	0	1891	2893	4631	6640	7608	6966	0	4573
	33	2378	1838	3027	4589	6491	0	6768	6823	0										Background		283072
	34	2088	1766	2930	4697	0	7396	0	0	5242
	35	1980	1697	2917	4838	6366	7310	6614	6881	0										Interband		194474	60.2109
	36	0	1691	2834	4630	6280	0	0	0	0
	37	1937	1660	2909	0	6309	7094	6547	6847	5286										Low Intensity		115038	35.6168
	38	1743	1625	2720	4822	0	0	6323	0	0
	39	1583	1725	2923	4680	6089	6710	0	6936	5528										High Intesity		13476	4.17229
	40	0	1671	2851	4716	5893	6521	5970	0	0
	41	1544	1769	2910	4824	5912	0	0	7120	0												322988	100
	42	1500	0	0	4797	0	6253	5794	0	5793
	43	1419	1689	2869	0	5692	6081	0	7064	0
	44	0	1775	3000	4734	5574	0	5346	0	5558
	45	1328	1665	2816	4582	5366	5782	5092	6926	0												Slice 5
	46	1280	1736	2761	4508	0	5423	0	0	0
	47	1201	1790	2889	4414	5335	0	5081	6990	5753												Count	%
	48	0	1785	2875	4268	5243	5331	0	0	0
	49	1150	1797	2755	0	5094	5252	4762	6882	5631										Background		313020
	50	1105	1829	2819	4320	0	0	4604	0	0
	51	1119	1830	2772	4098	4992	5064	0	0	0										Interband		209675	58.8862
	52	0	1828	2881	4074	4873	0	4357	6688	5410
	53	1076	1838	2918	4008	4802	4966	0	0	0										Low Intensity		134981	37.9088
	54	1070	1779	2812	3892	0	4720	4257	6618	5291
	55	978	1864	2847	3891	4820	0	4140	0	0										High Intesity		11412	3.20501
	56	0	0	0	0	4651	4737	0	6372	0
	57	1013	1955	2761	3840	4701	4626	3974	0	4991												356068	100
	58	1004	1917	2811	3651	0	0	0	6170	0
	59	927	1930	2767	3710	4709	4343	3858	0	4716
	60	0	1905	2783	3673	4597	4389	0	6094	0
	61	953	1982	2818	3546	4484	0	3825	0	0												Slice 6
	62	904	1944	2664	0	0	4279	3709	5985	4682
	63	876	1956	2753	3664	4465	0	0	0	0												Count	%
	64	819	2031	2756	3550	4308	4223	3668	5630	4534
	65	0	2043	2642	3435	0	4254	0	0	0										Background		350809
	66	829	1984	2736	3434	4445	0	3756	5472	0
	67	845	2077	2677	3435	4362	4205	3674	0	4357										Interband		205249	62.0705
	68	900	2010	2694	0	4329	4109	0	5409	0
	69	0	2061	2697	3513	0	0	3545	0	4180										Low Intensity		112968	34.1633
	70	855	2078	2615	3365	4241	4189	0	5149	0
	71	850	0	0	3301	4385	4092	3519	0	0										High Intesity		12454	3.76628
	72	838	2120	2681	3353	4197	0	3577	4885	4056
	73	0	2045	2775	3249	0	4162	0	0	0												330671	100
	74	813	2046	2666	0	4207	4091	3701	4903	3947
	75	834	2072	2678	3231	4212	0	0	0	0
	76	828	2177	2690	3387	4037	4057	3581	0	0												Slice 7
	77	0	2119	2686	3288	0	0	3660	4657	3644
	78	804	2112	2729	3313	4160	4045	0	0	0												Count	%
	79	832	2174	2684	3181	4099	4264	3762	4460	3621
	80	902	2202	2891	3187	3975	0	0	0	0										Background		332444
	81	0	2189	2748	0	0	4135	3823	4279	0
	82	815	2139	2790	3199	4026	4131	0	0	3525										Interband		175898	54.757
	83	877	2220	2772	3299	4169	0	3851	4240	0
	84	816	2312	2834	3140	4000	4263	3864	0	3358										Low Intensity		133114	41.4383
	85	0	0	0	3186	0	4116	0	4098	0
	86	809	2177	2835	3180	3940	0	4007	0	3384										High Intesity		12222	3.8047
	87	873	2262	2749	0	4035	4151	0	3929	0
	88	846	2235	2852	3353	4101	4052	4098	0	0												321234	100
	89	0	2264	2809	3216	0	0	4224	3899	3214
	90	855	2350	2945	3244	3949	4204	0	0	0
	91	846	2364	2927	3157	4031	0	4138	3651	3276
	92	883	2279	2892	3409	4009	4142	0	0	0												Slice 9
	93	0	2311	3071	0	0	4227	4182	3583	0
	94	867	2357	3005	3341	3958	0	4320	0	3037												Count	%
	95	777	2333	2976	3326	4084	4111	0	3479	0
	96	873	2382	3017	3311	0	4153	4372	0	2959										Background		214809
	97	0	2451	3112	3246	4109	0	0	3472	0
	98	904	2442	3089	3368	3955	4135	4492	0	0										Interband		181247	59.692
	99	875	0	0	0	3991	4107	0	3321	2959
	100	900	2464	3093	3267	0	0	4499	0	0										Low Intensity		111824	36.8282
	101	0	2467	3132	3365	4069	4079	4612	3382	2938
	102	918	2475	3196	3429	4093	0	0	0	0										High Intesity		10566	3.47981
	103	872	2499	3202	3368	4264	4172	4608	0	0
	104	870	2560	3172	3557	0	4140	0	3223	3010												303637	100
	105	0	2501	3290	3549	4230	0	4759	0	0
	106	942	2421	3349	0	4228	4180	4723	3224	3005
	107	927	2454	3299	3583	4139	4094	0	0	0
	108	894	2474	3371	3575	0	0	4909	3266	0												Slice 9
	109	0	2514	3275	3758	4186	4129	0	0	2965
	110	930	2632	3321	3704	4292	4120	4877	3310	0												Count	%
	111	870	2586	3413	3684	4329	0	4851	0	2915
	112	913	2527	3453	0	0	4195	0	3220	0										Background		192725
	113	0	0	0	3741	4217	4117	4838	0	0
	114	905	2462	3420	3741	4213	0	0	3300	2955										Interband		114678	54.49
	115	837	2503	3404	3864	4305	4242	4914	0	0
	116	879	2470	3439	3901	0	0	4969	3292	2913										Low Intensity		87156	41.4127
	117	0	2583	3412	3862	4339	4190	0	0	0
	118	900	2506	3422	0	4284	4267	4907	3463	0										High Intesity		8623	4.09727
	119	876	2556	3441	3861	4412	0	0	0	2970
	120	833	2557	3401	3928	0	4240	5092	3436	0												210457	100
	121	0	2666	3538	3915	4362	4194	0	0	2913
	122	858	2568	3514	4115	4417	0	4983	3456	0
	123	857	2552	3453	4011	4253	4229	4916	0	0
	124	853	2584	3395	0	0	4209	0	3455	2910												Slice 10
	125	0	2584	3389	3951	4425	0	4908	0	0
	126	911	2521	3384	4110	4338	4257	0	3591	2881												Count	%
	127	834	0	0	4101	0	0	4908	0	0
	128	827	2719	3393	4072	4424	4156	4905	0	0										Background		116968
	129	839	2500	3357	4245	4402	4262	0	3558	3041
	130	0	2613	3446	4082	4402	0	5003	0	0										Interband		77843	54.0186
	131	868	2669	3259	0	0	4208	0	3545	2876
	132	875	2595	3247	4103	4398	4277	4997	0	0										Low Intensity		58211	40.3951
	133	775	2648	3229	4086	4323	0	4940	3796	0
	134	0	2663	3399	4143	4280	4239	0	0	3011										High Intesity		8050	5.58624
	135	832	2780	3312	4126	0	4237	4881	3738	0
	136	865	2667	3175	4093	4361	0	0	0	2828												144104	100
	137	843	2685	3096	0	4366	4294	4788	3728	0
	138	0	2737	3220	4147	4218	4252	0	0	0
	139	828	2745	3159	4137	0	0	4804	3775	2921
	140	821	2712	3081	4160	4231	4150	4674	0	0
	141	841	2734	3100	4131	4118	0	0	3811	2804
	142	0	0	0	4157	4011	4225	4669	0	0
	143	803	2716	3028	0	0	4387	0	3841	0
	144	818	2695	3069	4065	4100	0	4694	0	2897
	145	798	2730	2989	4205	4045	4186	4573	3778	0
	146	0	2669	2992	4024	3956	4293	0	0	2903
	147	828	2649	2918	3987	0	0	4498	3818	0
	148	836	2592	2942	3996	3888	4017	0	0	0
	149	826	2756	2894	0	3802	4197	4443	3745	2840
	150	0	2689	2827	4017	3688	0	4295	0	0
	151	838	2729	2812	3894	0	4210	0	3703	2724
	152	818	2710	2763	3920	3701	4112	4230	0	0
	153	778	2645	2771	3909	3679	0	0	0	0
	154	0	2630	2760	3955	3615	4138	4345	3777	2648
	155	851	2676	2731	3776	0	0	4245	0	0
	156	752	0	0	0	3443	4210	0	3743	2612
	157	769	2548	2718	3808	3449	4021	4184	0	0
	158	0	2487	2613	3787	3317	0	0	3657	0
	159	783	2462	2584	3645	0	4032	3898	0	2566
	160	812	2550	2657	3659	3335	3884	0	3581	0
	161	786	2314	2485	3591	3095	0	3891	0	2524
	162	0	2481	2393	0	0	3955	3843	3595	0
	163	770	2364	2450	3512	2988	3988	0	0	0
	164	782	2363	2390	3419	3054	0	3734	3436	2437
	165	753	2295	2392	3255	2950	3920	0	0	0
	166	0	2243	2307	3279	0	0	3695	3267	2361
	167	716	2354	2264	3219	2775	3831	3554	0	0
	168	787	2288	2244	0	2766	3810	0	3326	0
	169	768	2195	2104	3118	2709	0	3465	0	2347
	170	0	0	0	3104	0	3672	0	3214	0
	171	760	2168	2090	3003	2698	3601	3342	0	2270
	172	666	2114	2081	3008	2614	0	3250	3019	0
	173	743	1989	2054	2905	2624	3622	0	0	2163
	174	0	2006	2071	0	0	3596	3175	2958	0
	175	709	1883	2066	2843	2467	0	0	0	0
	176	695	1977	1983	2770	2384	3445	2999	2924	2137
	177	691	1893	1899	2622	2260	3366	0	0	0
	178	0	1769	1840	2545	0	0	2906	2738	2118
	179	763	1722	1787	2511	2233	3252	2877	0	0
	180	675	1706	1771	2418	2090	0	0	0	0
	181	660	1665	1727	0	2191	3195	2702	2639	1987
	182	0	1642	1642	2361	0	3026	0	0	0
	183	732	1569	1601	2293	2028	0	2479	2598	1896
	184	704	0	0	2243	1921	2976	2434	0	0
	185	659	1534	1617	2118	1884	2908	0	2541	0
	186	0	1469	1558	1971	0	0	2380	0	1966
	187	644	1422	1472	0	1800	2800	0	2413	0
	188	688	1390	1488	1989	1750	2656	2311	0	1773
	189	668	1304	1481	1884	1702	0	2202	2295	0
	190	0	1340	1447	1897	0	2778	0	0	0
	191	650	1295	1397	1849	1670	0	2169	2147	1753
	192	638	1204	1357	1683	1596	2581	0	0	0
	193	685	1240	1292	0	0	2531	2002	2101	1697
	194	646	1161	1278	1642	1581	0	1979	0	0
	195	0	1183	1275	1475	1495	2394	0	1912	0
	196	663	1080	1206	1521	1418	2351	1829	0	1673
	197	634	1120	1214	1414	0	0	0	1854	0
	198	600	1031	1143	1409	1429	2237	1794	0	1642
	199	0	0	0	0	1260	2065	0	1763	0
	200	624	935	1076	1298	1293	0	1724	0	0
	201	623	965	1033	1303	0	1952	1496	1673	1479
	202	640	942	1059	1219	1253	1919	0	0	0
	203	0	952	1031	1118	1278	0	1475	1586	1437
	204	624	921	1022	1083	1171	1834	0	0	0
	205	648	806	948	1020	0	0	1390	0	0
	206	631	859	956	0	1128	1714	1332	1445	1293
	207	0	781	885	1007	1090	1649	0	0	0
	208	632	776	924	971	1043	0	1163	1393	1389
	209	573	751	889	896	0	1568	0	0	0
	210	625	736	807	831	1021	1416	1238	1266	0
	211	0	673	861	779	988	0	1105	0	1230
	212	620	649	779	0	950	1368	0	1167	0
	213	644	0	0	758	0	1315	1030	0	1177
	214	634	647	795	723	847	0	0	1141	0
	215	0	612	767	722	878	1201	999	0	0
	216	597	627	758	651	791	1133	0	1092	1080
	217	617	565	740	611	0	0	879	0	0
	218	574	591	727	0	859	1013	905	1000	1108
	219	0	537	686	589	789	0	0	0	0
	220	617	528	687	585	720	977	865	894	0
	221	603	519	634	542	0	930	0	0	966
	222	576	514	672	533	714	0	852	826	0
	223	0	500	649	501	694	914	719	0	918
	224	577	464	657	0	0	851	0	727	0
	225	577	476	624	504	627	0	699	0	0
	226	582	455	586	513	586	794	0	754	820
	227	0	0	0	443	572	703	684	0	0
	228	536	464	531	434	0	0	615	676	795
	229	563	419	529	401	577	684	0	0	0
	230	541	350	516	411	534	0	607	0	0
	231	0	391	512	0	493	622	0	631	695
	232	584	388	475	383	0	605	559	0	0
	233	544	390	492	345	509	0	558	598	659
	234	552	378	475	347	488	547	0	0	0
	235	0	364	437	353	484	526	499	530	0
	236	522	334	471	356	0	0	0	0	588
	237	556	346	447	0	422	511	485	522	0
	238	550	359	426	313	384	461	0	0	564
	239	0	316	420	309	399	0	441	456	0
	240	572	321	384	316	0	393	424	0	0
	241	540	0	0	298	389	421	0	386	457
	242	522	350	369	263	381	0	383	0	0
	243	0	317	386	0	359	366	0	359	424
	244	518	316	393	272	0	0	336	0	0
	245	474	319	366	255	368	352	343	354	0
	246	494	313	330	251	291	298	0	0	377
	247	0	288	329	235	301	0	312	318	0
	248	462	311	325	219	0	307	0	0	316
	249	449	272	291	0	260	293	294	274	0
	250	450	263	278	234	253	0	313	0	0
	251	0	272	275	201	259	259	0	290	326
	252	459	294	259	232	0	248	252	0	0
	253	454	231	222	217	246	0	0	236	322
	254	454	225	224	180	242	214	226	0	0
	255	11847	2732	2104	3127	3030	3618	2536	2239	1707

## Sheet: Series14
Bin procedure GFP histone images: Series 14
															Series							slice 2
	Count
	Value	Slice 2	Slice 3	Slice 4	Slice 5	Slice 6	Slice 7	Slice 8	Slice 9	Slice 10					Count	%						Count	%
	0	5045	5721	21615	4641	149	2378	0	0	0
	1	4830	7134	12993	15507	2197	0	0	0	0			Background		2295017					Background		192636
	2	6684	0	0	0	0	5850	97	17	5
	3	0	9478	13250	10798	3893	0	0	0	0			Interband		1474399	57.6742				Interband		64112	47.9816
	4	8074	10629	12427	0	0	8597	437	156	0
	5	8812	0	0	8531	5333	0	0	0	66			Low Intensity		984003	38.4913				Low Intensity		58522	43.798
	6	9587	10705	11180	8344	0	9699	1248	606	0
	7	0	10306	9719	0	6552	0	0	0	0			High Intesity		98027	3.83453				High Intesity		10984	8.22045
	8	9662	0	0	8599	0	10022	2451	1516	323
	9	9055	9137	8453	0	7245	0	0	0	0					2556429	100						133618	100
	10	8729	8101	6968	8313	0	9321	3634	0	0
	11	0	0	0	7826	7482	0	0	2456	1160
	12	7755	7336	5908	0	0	8760	4871	0	0
	13	6914	6395	5199	6914	7150	0	0	3808	2373												Slice 3
	14	6194	0	0	0	0	8013	0	0	0			Summary
	15	0	5734	4573	6375	6744	0	5686	5021	0		Series		Interband		Low int.		High int.				Count	%
	16	5644	5071	4258	5680	6320	7420	0	0	4248
	17	5065	0	0	0	0	0	6397	5999	0		4		59		36		4		Background		210285
	18	0	4553	3988	5325	5790	7217	0	0	0		12		57		38		5
	19	4508	0	0	0	0	0	6945	0	6352		14		58		38		4		Interband		145175	50.3292
	20	4244	4144	3854	5046	5407	6938	0	7093	0		17		50		45		5
	21	3964	3707	3879	0	0	0	7371	0	0		19		54		40		6		Low Intensity		128882	44.6807
	22	0	0	0	5070	5323	6902	0	8035	8399		21		48		45		7
	23	3842	3255	4000	5039	0	0	7709	0	0		23		48		46		6		High Intesity		14394	4.9901
	24	3507	3114	4050	0	5365	7040	0	9133	10301		25		47		48		5
	25	3317	0	0	5321	0	0	8126	0	0		32		50		44		6				288451	100
	26	0	2917	4072	0	5551	7324	0	9700	0		34		45		49		6
	27	3110	2667	4079	5399	0	0	8781	0	12098
	28	3017	0	0	5659	5870	7449	0	10354	0		Mean		51.6		42.9		5.4
	29	2870	2581	4208	0	0	0	0	0	0		SD		4.75815		4.32319		0.916515				Slice 4
	30	0	2501	4245	6009	6129	7622	9275	0	12640
	31	2789	0	0	0	0	0	0	10832	0												Count	%
	32	2652	2402	4294	6213	6566	8032	9683	0	0
	33	0	2335	4252	6288	6467	0	0	11038	13465										Background		295192
	34	2429	0	0	0	0	8050	10150	0	0
	35	2414	2318	4313	6529	6500	0	0	11068	13877										Interband		190191	56.9557
	36	2299	0	0	0	0	8093	10188	0	0
	37	0	2307	4289	6440	6504	0	0	11046	0										Low Intensity		132573	39.7011
	38	2107	2359	4220	6629	0	8041	10297	0	13664
	39	1995	0	0	0	6671	0	0	0	0										High Intesity		11164	3.34324
	40	1914	2375	4252	6684	0	7764	10450	10909	0
	41	0	2412	4294	0	6502	0	0	0	13178												333928	100
	42	1919	0	0	6488	0	7912	0	10481	0
	43	1831	2404	4330	0	6521	0	10192	0	0
	44	1736	2449	4181	6656	0	7517	0	9919	12381
	45	0	0	0	6516	6492	0	9672	0	0												Slice 5
	46	1592	2426	4323	0	0	7449	0	9559	11615
	47	1589	2589	4330	6433	6479	0	9322	0	0												Count	%
	48	0	0	0	0	6203	7321	0	9161	0
	49	1485	2472	4345	6308	0	0	8964	0	10788										Background		306859
	50	1488	2497	4387	6177	6042	7073	0	0	0
	51	1390	0	0	0	0	0	8461	8809	0										Interband		202031	54.8674
	52	0	2471	4393	6280	6029	6705	0	0	9875
	53	1347	2575	4274	0	0	0	8041	8150	0										Low Intensity		154374	41.9247
	54	1285	0	0	6109	5927	6572	0	0	0
	55	1267	2551	4404	5986	0	0	7530	7915	9356										High Intesity		11812	3.20789
	56	0	0	0	0	5848	6409	0	0	0
	57	1270	2569	4449	5859	0	0	0	7167	8500												368217	100
	58	1312	2520	4404	0	5722	6256	7140	0	0
	59	1284	0	0	5649	0	0	0	0	0
	60	0	2640	4465	0	5658	6103	6630	7030	7693
	61	1277	2582	4399	5502	0	0	0	0	0												Slice 6
	62	1183	0	0	5467	5695	6068	6567	6487	0
	63	0	2613	4449	0	0	5827	0	0	7123												Count	%
	64	1104	2588	4488	5271	5529	0	6352	6171	0
	65	1142	0	0	0	5617	5846	0	0	0										Background		258485
	66	1138	2635	4377	5380	0	0	5939	5959	6645
	67	0	2717	4445	5124	5418	5815	0	0	0										Interband		229453	56.8911
	68	1217	0	0	0	0	0	5842	0	6059
	69	1181	2715	4326	5051	5451	5676	0	5635	0										Low Intensity		162912	40.3927
	70	1183	2761	4349	0	0	0	5805	0	0
	71	0	0	0	4968	5348	5578	0	5426	5631										High Intesity		10955	2.71621
	72	1169	2728	4134	4888	0	0	0	0	0
	73	1176	0	0	0	5433	5727	5847	5303	0												403320	100
	74	1155	2753	4266	4714	0	0	0	0	5521
	75	0	2811	4277	0	5551	5576	5770	5170	0
	76	1171	0	0	4628	0	0	0	0	0												Slice 7
	77	1179	2871	4211	4683	5395	5543	5730	4900	4957
	78	1124	2908	4085	0	0	0	0	0	0												Count	%
	79	0	0	0	4768	5546	5717	5699	0	4840
	80	1189	2840	4147	0	5381	0	0	5101	0										Background		292866
	81	1225	2906	4122	4775	0	5644	5677	0	0
	82	0	0	0	0	5490	0	0	4952	4503										Interband		216304	57.3548
	83	1207	2961	4061	4689	0	5519	5729	0	0
	84	1234	2998	4124	4752	5617	0	0	5078	0										Low Intensity		146572	38.8648
	85	1152	0	0	0	0	5521	0	0	4398
	86	0	2987	4118	4597	5717	0	5737	5158	0										High Intesity		14257	3.78036
	87	1190	2972	4255	0	0	5501	0	0	0
	88	1126	0	0	4797	5551	0	5835	0	4187												377133	100
	89	1272	2980	4164	4710	0	5573	0	5177	0
	90	0	2969	4093	0	5726	0	5937	0	4058
	91	1268	0	0	4881	0	5623	0	5320	0
	92	1203	2997	4050	0	5910	0	6030	0	0												Slice 8
	93	1165	0	0	4882	0	5646	0	5340	3980
	94	0	3059	4107	4885	5837	0	6147	0	0												Count	%
	95	1259	3083	4075	0	0	5787	0	5472	0
	96	1233	0	0	4930	6044	0	6135	0	3870										Background		258976
	97	0	3101	4043	0	5894	5764	0	5703	0
	98	1239	3090	4124	5019	0	0	6265	0	0										Interband		197605	64.1408
	99	1329	0	0	0	6022	5770	0	0	3846
	100	1306	3224	4237	4907	0	0	0	5802	0										Low Intensity		101423	32.921
	101	0	3083	4160	4989	6177	5951	6374	0	3694
	102	1193	0	0	0	0	0	0	5765	0										High Intesity		9052	2.9382
	103	1263	3223	4241	5249	6220	5814	6448	0	0
	104	1279	3140	4371	0	0	0	0	5827	3621												308080	100
	105	0	0	0	5080	6359	5924	6496	0	0
	106	1327	3226	4160	5088	0	0	0	6027	0
	107	1285	3168	4231	0	6372	5982	6457	0	3579
	108	1247	0	0	5250	0	0	0	0	0												Slice 9
	109	0	3329	4268	0	6359	6097	6704	5906	0
	110	1281	0	0	5194	0	0	0	0	3447												Count	%
	111	1284	3301	4265	5285	6587	6166	6629	5913	0
	112	0	3292	4430	0	6495	0	0	0	3494										Background		252082
	113	1297	0	0	5385	0	6228	0	5899	0
	114	1354	3311	4368	0	6673	0	6798	0	0										Interband		150183	68.796
	115	1259	3328	4501	5452	0	6228	0	5814	3356
	116	0	0	0	5409	6765	0	6787	0	0										Low Intensity		59190	27.1138
	117	1311	3543	4581	0	0	6326	0	5731	0
	118	1299	3318	4558	5396	6848	0	6949	0	3219										High Intesity		8929	4.09021
	119	1392	0	0	0	0	6547	0	0	0
	120	0	3475	4487	5430	6739	0	6963	5639	0												218302	100
	121	1296	3523	4590	0	0	6639	0	0	3164
	122	1343	0	0	5319	6769	0	6997	5577	0
	123	1329	3503	4717	5301	0	6796	0	0	3081
	124	0	3549	4630	0	7022	0	6900	5403	0												Slice 10
	125	1341	0	0	5354	0	6958	0	0	0
	126	1382	3638	4653	0	6986	0	6921	5281	3061												Count	%
	127	0	0	0	5358	0	6878	0	0	0
	128	1330	3545	4595	5502	6910	6947	0	0	0										Background		227636
	129	1374	3617	4652	0	7080	0	6719	4975	3033
	130	1407	0	0	5405	0	6951	0	0	0										Interband		79345	63.2836
	131	0	3686	4838	0	7087	0	6723	4797	0
	132	1303	3684	4668	5367	0	7002	0	0	2915										Low Intensity		39555	31.5481
	133	1331	0	0	5423	7175	0	6613	4689	0
	134	1353	3876	4752	0	0	7120	0	0	2746										High Intesity		6480	5.16829
	135	0	3667	4698	5474	7240	0	6588	4426	0
	136	1385	0	0	0	0	7010	0	0	0												125380	100
	137	1387	3677	4667	5318	6999	0	6276	0	2548
	138	1403	3777	4702	0	0	6973	0	4302	0
	139	0	0	0	5498	7084	0	6223	0	0
	140	1438	3672	4762	5389	0	7031	0	4081	2671
	141	1404	3701	4753	0	7209	0	5977	0	0
	142	1412	0	0	5333	0	7017	0	3939	0
	143	0	3733	4696	0	7149	0	0	0	2533
	144	1460	3789	4558	5311	6949	7026	5864	3644	0
	145	1370	0	0	5309	0	0	0	0	2481
	146	0	3691	4634	0	6938	7087	5732	3498	0
	147	1352	0	0	5114	0	0	0	0	0
	148	1458	3689	4554	0	6944	6902	5652	0	2363
	149	1432	3726	4676	5359	0	0	0	3281	0
	150	0	0	0	5178	6853	6697	5452	0	0
	151	1443	3758	4651	0	0	0	0	3076	2517
	152	1353	3692	4421	5176	6771	6736	5296	0	0
	153	1399	0	0	0	0	0	0	2805	0
	154	0	3630	4367	5325	6608	6510	5034	0	2313
	155	1367	3613	4323	5172	0	0	0	2794	0
	156	1403	0	0	0	6604	6469	0	0	2189
	157	1410	3453	4261	5157	0	0	4921	0	0
	158	0	3477	4298	0	6358	6494	0	2569	0
	159	1400	0	0	5076	0	0	4834	0	2200
	160	1395	3513	4204	0	6274	6142	0	2366	0
	161	0	3518	3995	5036	6233	0	4646	0	0
	162	1415	0	0	5067	0	6032	0	2233	2200
	163	1365	3437	4028	0	6035	0	4428	0	0
	164	1375	0	0	4898	0	5844	0	2114	0
	165	0	3419	4050	0	6081	0	4203	0	2067
	166	1343	3299	4057	4831	0	5654	0	2072	0
	167	1429	0	0	4772	5821	0	3964	0	1988
	168	1319	3368	3839	0	0	5544	0	0	0
	169	0	3313	3725	4695	5696	0	3908	1939	0
	170	1326	0	0	0	0	5273	0	0	1915
	171	1279	3226	3572	4587	5520	0	0	1853	0
	172	1233	3231	3576	4562	0	5200	3840	0	0
	173	0	0	0	0	5425	0	0	1734	1873
	174	1288	3214	3484	4441	0	5013	3672	0	0
	175	1299	3131	3402	0	5320	0	0	1699	0
	176	0	0	0	4313	5070	4802	3425	0	1739
	177	1218	3010	3263	0	0	0	0	0	0
	178	1194	2986	3214	4121	4877	4620	3311	1588	1642
	179	1250	0	0	4108	0	0	0	0	0
	180	0	3007	3142	0	4828	4428	3112	1600	0
	181	1240	2883	3047	4062	0	0	0	0	1592
	182	1184	0	0	0	4534	4348	2950	1513	0
	183	1184	2882	2944	3986	0	0	0	0	0
	184	0	0	0	3696	4460	3952	0	1482	1417
	185	1140	2851	2793	0	0	0	2898	0	0
	186	1209	2774	2658	3563	4176	3803	0	1508	0
	187	1064	0	0	0	0	0	2748	0	1414
	188	0	2580	2628	3597	4051	3717	0	0	0
	189	1088	2659	2513	3337	0	0	2599	1416	1253
	190	1099	0	0	0	3773	3351	0	0	0
	191	0	2627	2496	3241	0	3336	2487	1416	0
	192	1071	2584	2326	0	3727	0	0	0	1239
	193	994	0	0	2996	3520	3144	2306	1398	0
	194	984	2467	2209	2961	0	0	0	0	0
	195	0	2355	2121	0	3311	2894	2209	1385	1247
	196	961	0	0	2937	0	0	0	0	0
	197	974	2396	2043	0	3192	2792	2005	0	0
	198	910	2149	1902	2673	0	0	0	1386	1115
	199	0	0	0	0	2916	2658	0	0	0
	200	873	2222	1791	2523	0	0	1924	1369	1106
	201	836	0	0	2340	2816	2451	0	0	0
	202	837	2063	1686	0	0	0	1802	1374	0
	203	0	2029	1698	2252	2637	2270	0	0	1024
	204	803	0	0	0	0	0	1779	1327	0
	205	780	1992	1591	2204	2408	2173	0	0	0
	206	747	1956	1524	2074	0	0	1643	0	916
	207	0	0	0	0	2272	2060	0	1281	0
	208	696	1824	1392	1864	2132	0	1565	0	0
	209	679	1766	1346	0	0	1946	0	1270	865
	210	0	0	0	1742	2006	0	1494	0	0
	211	662	1680	1303	1652	0	1797	0	1199	827
	212	610	1593	1199	0	1921	0	1386	0	0
	213	596	0	0	1513	0	1660	0	1104	0
	214	0	1550	1135	0	1679	0	0	0	767
	215	638	1469	1078	1408	0	1580	1238	1077	0
	216	640	0	0	0	1593	0	0	0	0
	217	598	1406	1018	1362	0	1452	1234	0	758
	218	0	1351	962	1232	1552	0	0	971	0
	219	508	0	0	0	0	1318	1094	0	0
	220	539	1373	919	1209	1420	0	0	1042	739
	221	503	0	0	0	0	1259	1037	0	0
	222	0	1210	900	1062	1306	0	0	985	633
	223	486	1170	803	1014	0	1153	979	0	0
	224	454	0	0	0	1136	0	0	964	0
	225	0	1038	723	962	1071	1018	883	0	655
	226	443	1076	716	0	0	0	0	0	0
	227	435	0	0	898	935	975	0	903	0
	228	430	968	658	811	0	0	840	0	547
	229	0	901	610	0	917	901	0	794	0
	230	423	0	0	762	0	0	731	0	0
	231	373	864	586	0	812	831	0	766	507
	232	409	767	547	730	0	0	647	0	0
	233	0	0	0	643	707	742	0	738	470
	234	381	722	455	0	0	0	629	0	0
	235	348	671	456	639	669	675	0	639	0
	236	386	0	0	0	0	0	530	0	420
	237	0	604	429	594	632	635	0	0	0
	238	312	0	0	0	0	0	518	596	0
	239	323	553	408	518	551	569	0	0	362
	240	0	555	355	454	542	0	460	554	0
	241	344	0	0	0	0	511	0	0	0
	242	316	517	390	440	484	0	0	470	371
	243	298	471	323	0	0	436	428	0	0
	244	0	0	0	427	395	0	0	457	361
	245	298	418	304	362	0	423	389	0	0
	246	265	369	277	0	372	0	0	0	0
	247	288	0	0	365	0	368	364	406	317
	248	0	392	266	0	305	0	0	0	0
	249	262	348	260	316	0	319	303	366	0
	250	250	0	0	289	294	0	0	0	334
	251	204	319	241	0	0	271	268	299	0
	252	0	265	222	227	254	0	0	0	0
	253	239	0	0	0	0	266	255	282	285
	254	213	252	204	271	233	1699	0	0	0
	255	3744	2324	2734	2104	1782	3618	1807	1659	1851

## Sheet: Series17
Bin procedure GFP histone images: Series 17
															Series							slice 2
	Count
	Value	Slice 2	Slice 3	Slice 4	Slice 5	Slice 6	Slice 7	Slice 8	Slice 9	Slice 10					Count	%						Count	%
	0	7918	393	2960	3656	921	8	0	0	0
	1	5430	7514	16333	19011	6410	264	39	6	0			Background		2517682					Background		190795
	2	6108	12574	14662	14944	6858	880	179	78	0
	3	6627	14801	13136	12414	6803	1886	493	0	0			Interband		1260305	50.097				Interband		63785	46.9245
	4	6760	15580	12090	10485	6838	2857	0	258	5
	5	6796	15164	10853	9365	6470	0	997	653	0			Low Intensity		1133020	45.0374				Low Intensity		62013	45.6209
	6	6860	14314	10080	8708	6235	3997	1567	0	34
	7	6716	13178	9272	7807	0	4916	2283	1252	0			High Intesity		122404	4.86555				High Intesity		10133	7.45452
	8	6278	11973	8189	6955	6002	5727	0	1921	124
	9	6200	11019	7800	6094	5660	6202	2992	0	0					2515729	100						135931	100
	10	5861	9969	6788	5337	5454	6728	3718	2718	363
	11	5739	8834	6108	4786	5013	0	4297	3418	0
	12	5420	8062	5433	4013	4844	6655	0	0	0
	13	5025	7475	4980	3649	4616	6670	4833	4148	696			Summary									Slice 3
	14	4826	6565	4710	3269	4250	6497	5488	4665	0		Series		Interband		Low int.		High int.
	15	4514	6005	4276	0	0	6368	5838	0	1319												Count	%
	16	4285	5422	4164	2992	4020	0	0	5110	0		4		59		36		4
	17	4046	5053	4110	2834	3691	6153	5882	5460	1942		12		57		38		5		Background		292355
	18	3702	4536	3792	2741	3711	5677	6099	0	0		14		58		38		4
	19	3539	4139	3685	2780	3597	5582	6230	5632	2930		17		50		45		5		Interband		125641	41.5451
	20	3174	3784	3554	2670	3587	5465	0	5823	0		19		54		40		6
	21	3023	3694	3520	2764	3581	5084	6277	0	3811		21		48		45		7		Low Intensity		159962	52.8938
	22	2917	3371	3460	2967	0	0	6146	5766	0		23		48		46		6
	23	2676	3091	3382	3187	3696	5201	6185	5844	0		25		47		48		5		High Intesity		16818	5.56112
	24	2533	2854	3256	3356	3938	5163	0	0	4823		32		50		44		6
	25	2438	2633	3372	3460	4235	5226	6213	5815	0		34		45		49		6				302421	100
	26	2310	2551	3205	3761	4593	5438	6019	5867	5746
	27	2102	2449	3188	3974	4829	0	5886	0	0		Mean		51.6		42.9		5.4
	28	2000	2376	3036	4059	5055	5537	0	5830	6819		SD		4.75815		4.32319		0.916515
	29	1908	2203	3211	4248	5351	5794	5882	5572	0												Slice 4
	30	1844	2140	3057	0	0	5985	5816	0	7542
	31	1702	2073	3032	4402	5834	6076	5711	5564	0												Count	%
	32	1630	2016	3024	4441	6245	6439	5550	5537	8120
	33	1539	1964	3066	4614	6209	0	0	0	0										Background		321286
	34	1504	1929	3024	4757	6547	6554	5408	5401	0
	35	1438	1829	2858	4707	6603	6800	5387	5496	8627										Interband		180283	48.8506
	36	1365	1776	2905	4628	6646	6872	5332	0	0
	37	1299	1717	2749	4649	0	6805	0	5457	9101										Low Intensity		172588	46.7655
	38	1205	1599	2864	4765	6647	0	5267	5447	0
	39	1196	1630	2746	4725	6755	6869	5159	0	9283										High Intesity		16179	4.38396
	40	1109	1665	2691	4783	6700	6866	4937	5411	0
	41	1130	1494	2743	4509	6609	6898	0	5334	9352												369050	100
	42	1118	1558	2792	4564	6373	6645	4955	0	0
	43	1053	1500	2698	4470	6249	6727	4860	5236	9385
	44	1049	1480	2640	4432	6261	0	4706	5168	0
	45	1025	1379	2628	0	0	6438	0	0	9217												Slice 5
	46	1088	1446	2596	4264	6216	6283	4564	5188	0
	47	1025	1433	2566	4236	5843	6068	4599	5068	0												Count	%
	48	966	1328	2542	4217	5654	5982	4414	0	9077
	49	994	1360	2524	4016	5363	5950	0	4915	0										Background		340715
	50	945	1352	2483	3926	5226	0	4392	4698	8568
	51	940	1292	2460	3884	5116	5659	4187	0	0										Interband		185948	47.3293
	52	926	1275	2495	3697	0	5494	4059	4497	8384
	53	939	1331	2499	3802	5086	5333	0	4392	0										Low Intensity		189960	48.3505
	54	959	1307	2448	3618	4840	5199	3927	0	7855
	55	904	1370	2486	3576	4716	0	3877	4307	0										High Intesity		16973	4.32014
	56	903	1339	2524	3316	4641	4963	3875	4062	7599
	57	876	1343	2490	3323	4566	5022	0	0	0												392881	100
	58	871	1425	2435	3222	4321	4773	3705	3998	0
	59	976	1350	2469	3109	4171	4736	3576	4053	7177
	60	876	1372	2516	0	0	4758	3505	0	0
	61	832	1427	2440	3142	4193	0	0	3936	6854												Slice 6
	62	849	1324	2473	3113	3956	4281	3553	3769	0
	63	0	1392	2439	2964	3860	4399	3383	0	6503												Count	%
	64	903	1430	2365	2890	3710	4239	3353	3694	0
	65	813	1376	2430	2843	3587	4249	3299	3530	6195										Background		342504
	66	852	1390	2378	2848	3583	0	0	3520	0
	67	801	1509	2414	2775	0	4231	3296	0	5800										Interband		175333	47.8576
	68	827	1479	2368	2759	3478	4255	3218	3370	0
	69	878	1480	2349	2726	3372	4052	3188	3454	0										Low Intensity		174349	47.589
	70	897	1531	2361	2634	3284	4049	0	0	5452
	71	822	1468	2292	2664	3201	3851	3135	3299	0										High Intesity		16682	4.55339
	72	871	1504	2315	2656	3116	0	3147	3310	5187
	73	851	1543	2333	2658	3080	3917	3031	0	0												366364	100
	74	829	1528	2273	2746	3137	3864	0	3158	4935
	75	849	1496	2323	0	0	3754	3025	3075	0
	76	821	1541	2313	2657	2978	3802	2951	0	4807												Slice 7
	77	832	1576	2242	2669	2905	0	2860	3016	0
	78	836	1533	2315	2541	2863	3657	0	3005	4514												Count	%
	79	858	1585	2308	2603	2940	3652	2891	0	0
	80	807	1529	2266	2631	2911	3538	2854	2971	4346										Background		347096
	81	814	1580	2319	2645	2655	3563	2898	2874	0
	82	828	1486	2315	2613	0	3574	0	0	0										Interband		180245	58.0068
	83	832	1585	2256	2575	2666	0	2855	2884	4082
	84	902	1568	2334	2488	2631	3541	2755	2832	0										Low Intensity		116674	37.5482
	85	884	1547	2286	2606	2772	3532	2757	0	3946
	86	863	1551	2365	2624	2717	3597	0	2767	0										High Intesity		13812	4.445
	87	864	1621	2376	2660	2721	3472	2749	2647	3804
	88	911	1626	2341	2653	2687	3509	2810	0	0												310731	100
	89	851	1528	2469	2714	2689	0	2761	2771	3820
	90	895	1598	2396	0	0	3504	0	2778	0
	91	927	1671	2435	2571	2633	3514	2836	0	3583
	92	864	1607	2362	2569	2677	3407	2749	2688	0												Slice 8
	93	926	1667	2480	2605	2660	3512	2832	2665	0
	94	908	1765	2449	2715	2654	0	0	0	3462												Count	%
	95	923	1675	2534	2615	2685	3522	2715	2724	0
	96	959	1758	2563	2616	2745	3517	2715	2780	3256										Background		255393
	97	940	1627	2446	2724	0	3456	2759	0	0
	98	910	1680	2534	2784	2664	3516	2640	2673	3156										Interband		149411	49.0346
	99	1011	1725	2524	2665	2727	3623	0	2694	0
	100	938	1752	2543	2680	2769	0	2727	0	2929										Low Intensity		140813	46.2129
	101	977	1831	2527	2749	2704	3609	2770	2714	0
	102	1000	1718	2529	2677	2752	3603	2757	2720	2860										High Intesity		14481	4.75247
	103	1019	1727	2619	2721	2742	3486	0	0	0
	104	978	1788	2616	2667	2810	3505	2762	2645	0												304705	100
	105	1005	1775	2597	0	0	0	2682	2671	2732
	106	965	1830	2587	2878	2930	3583	2749	0	0
	107	1077	1787	2744	2851	2972	3556	0	2731	2646
	108	972	1810	2714	2816	2937	3553	2721	2789	0												Slice 9
	109	963	1754	2584	2837	2939	3513	2746	0	2501
	110	968	1799	2682	2894	2753	3608	2840	2738	0												Count	%
	111	986	1881	2719	2813	2940	0	0	2747	2386
	112	1069	1839	2754	2819	0	3448	2770	0	0										Background		225046
	113	1062	1843	2722	2833	2896	3428	2821	2793	2230
	114	1027	1924	2694	2909	3011	3400	2759	2793	0										Interband		125291	56.305
	115	983	1829	2733	2932	2963	3411	0	0	2174
	116	1048	1947	2766	2923	3030	0	2876	2764	0										Low Intensity		87170	39.1737
	117	1014	1948	2838	2917	3120	3503	2915	2841	0
	118	1004	1882	2845	3061	3056	3296	3035	0	2141										High Intesity		10061	4.52135
	119	1019	2028	2881	2986	2996	3396	0	2734	0
	120	992	1972	2906	0	0	3303	2980	2784	2151												222522	100
	121	983	1982	2749	3092	3113	3371	2988	0	0
	122	1027	1979	2849	3131	3166	0	3003	2781	2070
	123	1031	2031	2965	3124	3083	3264	0	2839	0
	124	1019	1900	2987	3093	3231	3355	3035	0	1920
	125	1032	1992	2900	3063	3188	3218	3080	2833	0
	126	1020	2030	2842	3064	3187	3158	3119	2778	1717
	127	0	2120	2976	3190	0	0	0	0	0
	128	1029	2014	3012	3159	3171	3305	3158	2782	0
	129	1011	2088	2962	3293	3263	3336	3163	2830	1795
	130	1040	2055	2916	3251	3271	3214	3252	2887	0
	131	1124	2042	3019	3279	3280	3159	3121	0	1726
	132	1026	2085	2952	3347	3308	3125	0	2950	0
	133	1044	2076	2953	3363	3391	0	3138	2829	1647
	134	1135	2169	2944	3364	3282	3134	3323	0	0
	135	984	2026	3099	0	0	3160	3388	2937	1525
	136	969	2232	2902	3347	3285	3217	0	2826	0
	137	949	2129	2945	3357	3314	3072	3292	0	1514
	138	959	2093	2959	3387	3377	3003	3431	2888	0
	139	1052	2159	2995	3498	3286	0	3328	2894	0
	140	997	2207	2894	3355	3355	3143	0	0	1394
	141	997	2252	2939	3415	3449	3074	3345	2889	0
	142	1022	2217	3042	3405	3399	2914	3431	2876	1408
	143	993	2112	2928	3478	0	2987	3517	0	0
	144	991	2203	2978	3569	3401	0	0	2788	1316
	145	997	2123	2915	3568	3379	3000	3593	2766	0
	146	1005	2265	3031	3519	3518	3002	3442	0	1250
	147	957	2316	3005	3528	3448	2815	3421	2726	0
	148	956	2281	2875	3562	3540	2796	0	2825	1227
	149	1033	2239	2890	3556	3471	2867	3614	0	0
	150	980	2280	2978	0	0	0	3529	2717	1214
	151	1021	2258	2879	3581	3572	2764	3463	2646	0
	152	956	2281	2855	3565	3428	2734	0	0	0
	153	963	2275	2917	3590	3427	2755	3572	2786	1203
	154	961	2311	2908	3618	3594	2750	3439	2721	0
	155	915	2346	3010	3537	3537	0	3526	0	1102
	156	987	2329	3021	3609	3466	2728	0	2684	0
	157	996	2270	2952	3630	3481	2694	3449	2597	1099
	158	946	2332	2855	3670	0	2763	3480	0	0
	159	942	2374	2895	3618	3450	2671	3496	2557	1045
	160	999	2356	2801	3572	3372	2626	3427	2551	0
	161	980	2421	2848	3621	3571	0	0	0	1093
	162	944	2452	2836	3578	3387	2659	3380	2605	0
	163	987	2454	2962	3529	3455	2607	3375	2538	0
	164	968	2416	2838	3588	3377	2474	3322	0	991
	165	1045	2441	2769	0	0	2444	0	2539	0
	166	971	2437	2764	3451	3335	0	3273	2494	973
	167	944	2470	2809	3557	3397	2471	3310	0	0
	168	990	2472	2845	3420	3348	2413	3244	2408	966
	169	917	2370	2795	3530	3513	2558	0	2274	0
	170	945	2390	2672	3374	3369	2517	3122	0	933
	171	959	2447	2694	3403	3276	2336	3005	2150	0
	172	944	2458	2737	3273	3345	0	3086	2204	1016
	173	949	2390	2792	3345	0	2333	0	0	0
	174	940	2318	2762	3311	3298	2327	2990	2149	0
	175	913	2410	2690	3292	3331	2259	3011	2151	963
	176	964	2472	2679	3251	3290	2290	2942	0	0
	177	956	2390	2622	3311	3260	2233	0	2065	926
	178	914	2472	2594	3254	3168	0	2836	1994	0
	179	876	2404	2607	3201	3175	2170	2766	0	946
	180	924	2438	2615	0	0	2108	2717	1964	0
	181	858	2472	2510	3072	3170	2087	0	2096	936
	182	913	2291	2489	2995	3158	2066	2733	0	0
	183	920	2308	2448	3142	3028	0	2687	1940	877
	184	856	2263	2443	3075	2966	2019	2553	1863	0
	185	888	2366	2505	2920	2946	2018	0	0	887
	186	907	2318	2451	2899	2809	1995	2412	1807	0
	187	857	2334	2371	2827	2810	1932	2483	1628	0
	188	858	2293	2329	2876	0	1909	2366	0	822
	189	878	2236	2369	2734	2830	0	0	1642	0
	190	851	2255	2376	2713	2843	1812	2377	1608	800
	191	0	2214	2299	2652	2748	1803	2315	0	0
	192	849	2263	2266	2660	2679	1669	2171	1546	819
	193	850	2245	2309	2558	2728	1735	2241	1497	0
	194	805	2201	2162	2528	2563	0	0	1506	844
	195	790	2160	2109	0	0	1693	2117	0	0
	196	796	2218	2173	2505	2533	1698	2069	1438	830
	197	783	2179	2132	2417	2590	1539	2049	1378	0
	198	780	2097	2091	2420	2373	1579	0	0	0
	199	794	2034	2083	2321	2300	1497	1952	1290	777
	200	817	2029	2037	2264	2370	0	1921	1200	0
	201	797	2008	1904	2289	2141	1491	1838	0	751
	202	751	2022	1941	2163	2205	1416	0	1135	0
	203	721	1994	1893	2143	0	1386	1749	1163	777
	204	719	1974	1920	2075	2055	1408	1780	0	0
	205	711	1961	1848	1965	1989	0	1717	1114	734
	206	717	1851	1827	1962	1954	1250	0	1057	0
	207	711	1883	1710	1986	1851	1283	1621	0	801
	208	704	1826	1789	1824	1811	1220	1568	1006	0
	209	663	1757	1681	1812	1780	1217	1550	1001	0
	210	644	1775	1562	0	0	1145	0	0	680
	211	633	1643	1612	1671	1772	0	1464	954	0
	212	659	1635	1552	1714	1703	1186	1396	914	659
	213	648	1637	1474	1616	1575	1097	1333	0	0
	214	581	1540	1474	1595	1480	1056	0	855	660
	215	565	1575	1451	1489	1433	988	1325	794	0
	216	657	1462	1361	1434	1431	970	1235	0	645
	217	545	1446	1345	1407	1242	0	1170	755	0
	218	556	1443	1281	1338	0	889	0	710	561
	219	621	1381	1267	1305	1243	919	1135	0	0
	220	569	1299	1175	1331	1220	845	1097	671	592
	221	564	1285	1219	1182	1234	773	1054	628	0
	222	538	1215	1153	1157	1072	0	0	0	0
	223	502	1226	1135	1042	1028	794	989	613	569
	224	458	1175	1171	1047	993	739	972	567	0
	225	472	1106	1041	0	0	709	964	0	535
	226	470	1059	935	968	928	688	908	576	0
	227	462	1006	898	934	916	678	0	504	492
	228	444	926	926	896	872	0	831	0	0
	229	436	997	865	842	800	581	748	499	460
	230	455	905	817	811	796	603	706	479	0
	231	433	876	844	741	772	575	0	0	439
	232	412	823	792	717	701	553	688	489	0
	233	395	762	707	697	0	0	637	422	0
	234	398	742	668	666	640	555	640	0	423
	235	363	712	643	674	614	492	0	374	0
	236	342	643	581	635	565	478	627	371	423
	237	331	576	569	582	546	427	562	0	0
	238	333	556	575	557	482	377	551	345	406
	239	337	530	549	493	471	0	0	328	0
	240	310	514	453	0	0	402	487	0	338
	241	288	430	460	496	489	371	465	335	0
	242	303	413	434	464	427	366	450	325	338
	243	297	390	420	438	388	339	0	0	0
	244	264	346	350	394	400	0	406	295	0
	245	270	312	334	355	368	319	371	283	336
	246	246	283	323	372	361	308	387	0	0
	247	205	292	292	315	334	284	0	285	249
	248	229	263	286	343	0	282	367	235	0
	249	231	234	246	325	347	289	352	0	275
	250	167	177	232	249	312	0	296	238	0
	251	167	192	202	283	270	249	0	260	204
	252	184	135	158	247	260	226	277	0	0
	253	161	122	129	247	240	209	260	217	220
	254	163	124	148	234	238	197	223	194	0
	255	565	372	302	1998	3145	3255	2278	3007	2127

## Sheet: Series19
Bin procedure GFP histone images: Series 19
															Series							slice 2
	Count
	Value	Slice 2	Slice 3	Slice 4	Slice 5	Slice 6	Slice 7	Slice 8	Slice 9	Slice 10					Count	%						Count	%
	0	12489	76935	59270	68667	82911	88313	1625	1	0
	1	7017	19846	10962	11212	13986	19560	2175	80	4			Background		2721751					Background		241217
	2	7679	15674	9261	9007	10450	15320	2980	353	0
	3	8299	13180	8415	7856	8508	12015	3811	836	24			Interband		1015350	53.8366				Interband		42038	42.7133
	4	9173	11313	7826	7244	7597	9889	4391	0	112
	5	9917	10171	7377	6723	6938	8481	4758	1499	0			Low Intensity		763321	40.4733				Low Intensity		47306	48.0659
	6	9867	9409	6855	6177	6136	0	4943	2407	274
	7	9819	8913	6349	5672	5585	7255	0	3099	0			High Intesity		107314	5.69008				High Intesity		9075	9.22078
	8	9367	8486	5671	5159	5084	6356	5010	3815	513
	9	8724	8078	5161	4695	4656	5719	4972	0	983					1885985	100						98419	100
	10	8279	7542	4652	4292	4130	5105	4905	4495	0
	11	7536	7205	4302	3767	3813	4746	4708	5051	1500
	12	6961	6843	3888	3386	3525	4333	4576	5165	2077
	13	6471	6170	3596	3155	3149	0	4404	5797	0			Summary									Slice 3
	14	5781	5739	3385	2968	2967	3910	4260	0	2918		Series		Interband		Low int.		High int.
	15	5261	5205	3323	2754	2724	3803	0	5928	0												Count	%
	16	4944	4900	3126	2587	2481	3449	4245	6177	3555		4		59		36		4
	17	4524	4566	3050	2460	2387	3361	4145	6534	4141		12		57		38		5		Background		368295
	18	4286	4162	2981	2507	2324	3187	4228	0	0		14		58		38		4
	19	3917	3824	3049	2259	2255	2977	4212	6379	4680		17		50		45		5		Interband		107330	50.1709
	20	3664	3529	2844	2199	2092	0	4345	6778	5335		19		54		40		6
	21	3352	3327	2849	2213	2131	2933	4373	6674	0		21		48		45		7		Low Intensity		94796	44.3119
	22	3201	3081	2890	2210	1981	2865	0	6866	5834		23		48		46		6
	23	2979	2970	2911	2283	2115	2864	4509	0	0		25		47		48		5		High Intesity		11803	5.51725
	24	2865	2827	2818	2224	2112	2762	4745	6837	6226		32		50		44		6
	25	2731	2681	2681	2187	2001	2822	4755	6811	6404		34		45		49		6				213929	100
	26	2582	2516	2655	2191	1992	0	4888	6910	0
	27	2546	2571	2574	2377	2001	2886	5164	6704	6815		Mean		51.6		42.9		5.4
	28	2416	2397	2610	2347	2132	2969	5464	0	6939		SD		4.75815		4.32319		0.916515
	29	2301	2347	2479	2381	2073	2908	5440	6636	0												Slice 4
	30	2190	2337	2425	2419	2204	3003	0	6544	6868
	31	2174	2193	2409	2497	2246	2994	5582	6334	0												Count	%
	32	2199	2178	2289	2411	2211	3132	5927	6001	6791
	33	2018	2106	2264	2448	2230	0	6002	0	6841										Background		304093
	34	1854	2207	2289	2546	2461	3288	6103	5811	0
	35	1884	2213	2250	2456	2501	3347	6170	5615	6683										Interband		143659	49.9102
	36	1845	2136	2229	2550	2493	3348	6198	5406	6516
	37	1856	2258	2266	2436	2440	3498	0	0	0										Low Intensity		127109	44.1604
	38	1657	2245	2192	2576	2485	3654	6039	5170	6268
	39	1694	2083	2148	2571	2468	3770	6232	4942	0										High Intesity		17067	5.92944
	40	1656	2148	2177	2550	2520	0	6271	4705	5791
	41	1574	2057	2124	2768	2654	3820	6006	4515	5706												287835	100
	42	1465	2079	2120	2702	2712	3887	6018	0	0
	43	1457	2227	2110	2754	2620	4012	5833	4449	5466
	44	1574	2112	2176	2719	2646	4132	5621	4324	5071
	45	1404	2231	2086	2774	2753	4207	0	3909	0												Slice 5
	46	1269	2123	2207	2721	2620	4300	5391	3854	4765
	47	1378	2175	2091	2894	2715	0	5192	0	0												Count	%
	48	1258	2109	2083	2748	2490	4316	5140	3851	4508
	49	1265	2065	2130	2822	2504	4278	4953	3741	4190										Background		327618
	50	1218	2111	2057	2733	2624	4277	4603	3400	0
	51	1166	2128	2154	2802	2626	4345	4458	3447	3870										Interband		168571	55.5016
	52	1150	2063	2188	2803	2619	4483	0	0	3953
	53	1053	2017	2207	2746	2497	0	4223	3160	0										Low Intensity		121455	39.9887
	54	1074	2024	2109	2851	2589	4448	4188	3105	3451
	55	1055	1977	2190	2855	2574	4497	3856	2966	0										High Intesity		13697	4.5097
	56	1004	1950	2196	2815	2556	4438	3695	0	3494
	57	958	1877	2134	2839	2432	4410	3433	2951	3328												303723	100
	58	1044	1863	2231	2885	2572	4346	3419	2904	0
	59	958	1911	2204	2877	2640	4393	3300	2802	3182
	60	935	1836	2136	2775	2617	0	0	2558	3006
	61	902	1847	2174	2739	2614	4170	3196	0	0												Slice 6
	62	925	1742	2114	2808	2640	4180	2920	2578	2849
	63	879	1773	2125	2724	2464	4071	2773	2514	0												Count	%
	64	857	1813	2210	2679	2546	4063	2763	2515	2805
	65	811	1694	2151	2727	2486	4011	2656	2441	2626										Background		337764
	66	847	1725	2171	2653	2444	3893	2581	0	0
	67	859	1750	2152	2782	2525	0	0	2390	2653										Interband		195128	61.7439
	68	791	1690	2157	2726	2599	3921	2541	2310	2467
	69	804	1709	2102	2697	2698	3867	2442	2221	0										Low Intensity		115415	36.5205
	70	730	1637	2130	2634	2524	3664	2311	2117	2445
	71	764	1631	2024	2731	2550	3749	2225	0	0										High Intesity		5485	1.73561
	72	743	1702	2201	2656	2629	3617	2205	2106	2324
	73	748	1672	2220	2620	2584	3672	2202	2047	2191												316028	100
	74	737	1623	2054	2592	2635	0	2109	1988	0
	75	694	1609	2035	2677	2655	3394	0	0	2119
	76	696	1586	2013	2653	2602	3411	1987	2018	1923												Slice 7
	77	755	1645	2001	2665	2693	3244	2060	1941	0
	78	738	1582	2049	2654	2612	3219	2039	1869	1992												Count	%
	79	678	1596	2064	2605	2679	3261	1916	1869	0
	80	703	1611	2061	2692	2688	0	1870	0	1981										Background		403105
	81	665	1618	2060	2744	2651	3159	1901	1791	1894
	82	657	1594	2144	2658	2691	3128	0	1716	0										Interband		144405	53.9334
	83	652	1587	2008	2694	2765	3091	1912	1751	1790
	84	680	1516	2098	2740	2796	3100	1790	1640	1766										Low Intensity		108343	40.4647
	85	0	0	0	0	0	2962	1689	0	0
	86	652	1558	2008	2686	2823	2915	1829	1648	1767										High Intesity		14999	5.60193
	87	629	1546	2056	2708	2814	0	1723	1628	0
	88	579	1523	2021	2669	2971	2895	1728	1610	1613												267747	100
	89	668	1520	1984	2662	2682	2948	1690	1639	1524
	90	647	1626	2074	2630	2788	2862	0	0	0
	91	630	1559	2065	2771	2904	2811	1774	1548	1507
	92	631	1590	2084	2682	2817	2770	1679	1601	1494												Slice 8
	93	693	1577	2078	2711	2915	2853	1624	1606	0
	94	629	1598	2073	2705	2913	0	1613	0	1448												Count	%
	95	623	1618	2095	2702	2952	2721	1612	1615	0
	96	581	1545	2155	2745	2918	2658	1698	1580	1475										Background		296581
	97	642	1637	2097	2708	2865	2652	0	1668	1300
	98	656	1641	2080	2680	2924	2695	1597	1520	0										Interband		93634	51.0537
	99	607	1565	2111	2732	2958	2660	1687	0	1347
	100	596	1616	2145	2770	3015	2652	1562	1668	1267										Low Intensity		76936	41.9492
	101	616	1559	2153	2759	3075	0	1666	1607	0
	102	586	1618	2209	2640	3004	2611	1613	1502	1249										High Intesity		12833	6.99716
	103	617	1641	2098	2669	3045	2562	1578	1523	0
	104	632	1587	2063	2639	3013	2539	1663	0	1312												183403	100
	105	609	1673	2088	2548	3042	2557	0	1501	1219
	106	594	1629	2269	2641	3002	2619	1569	1529	0
	107	633	1604	2147	2668	2980	0	1569	1549	1161
	108	649	1681	2218	2620	3108	2582	1565	1509	1179												Slice 9
	109	617	1624	2259	2691	3067	2621	1609	0	0
	110	665	1596	2157	2709	3029	2448	1540	1504	1097												Count	%
	111	616	1587	2146	2713	3181	2563	1619	1497	0
	112	602	1661	2229	2613	3230	2584	0	1526	1048										Background		254727
	113	638	1680	2274	2615	3170	2465	1534	0	997
	114	656	1708	2186	2574	3065	0	1591	1488	0										Interband		76156	53.3556
	115	676	1634	2281	2611	3138	2485	1532	1485	1037
	116	608	1644	2269	2644	3177	2598	1676	1506	1005										Low Intensity		54397	38.111
	117	595	1704	2198	2610	3219	2461	1578	1450	0
	118	610	1725	2303	2545	3143	2464	1554	0	1002										High Intesity		12180	8.53342
	119	593	1707	2307	2604	3263	2385	1567	1486	0
	120	600	1618	2306	2660	3150	2512	0	1423	944												142733	100
	121	630	1650	2289	2648	3140	0	1563	1461	900
	122	644	1645	2204	2528	3113	2489	1536	1356	0
	123	644	1727	2216	2580	3204	2439	1595	0	859
	124	661	1706	2436	2644	3139	2442	1614	1361	868
	125	643	1723	2354	2512	3203	2555	1578	1417	0
	126	668	1695	2386	2583	2983	2528	1605	1429	878
	127	643	1679	2235	2507	3118	0	0	0	0
	128	650	1623	2360	2660	3120	2393	1600	1348	853
	129	649	1769	2377	2581	3176	2451	1544	1351	795
	130	677	1688	2368	2434	3070	2510	1509	1396	0
	131	668	1720	2356	2557	3052	2356	1515	1352	767
	132	633	1791	2391	2487	3093	2478	1612	0	721
	133	676	1677	2299	2542	3125	2523	1571	1412	0
	134	740	1716	2337	2517	3035	0	1569	1363	746
	135	664	1701	2289	2529	2980	2473	0	1349	0
	136	652	1756	2266	2521	3039	2471	1598	1269	669
	137	644	1689	2278	2455	2974	2481	1602	0	642
	138	670	1673	2269	2454	2921	2415	1601	1344	0
	139	712	1703	2305	2414	3041	2331	1636	1293	668
	140	689	1770	2251	2499	2894	2437	1559	1213	655
	141	712	1658	2277	2363	3035	0	1581	1284	0
	142	710	1642	2239	2381	2842	2425	1552	0	595
	143	708	1708	2279	2439	2912	2405	0	1299	0
	144	677	1708	2254	2487	2843	2475	1550	1281	586
	145	653	1688	2255	2401	2867	2321	1595	1271	594
	146	737	1690	2197	2340	2734	2350	1538	0	0
	147	683	1731	2301	2381	2778	2356	1576	1256	558
	148	694	1702	2199	2359	2776	0	1605	1244	527
	149	691	1659	2184	2417	2767	2465	1586	1244	0
	150	714	1593	2113	2390	2750	2368	0	1211	535
	151	724	1612	2218	2249	2669	2405	1613	0	0
	152	651	1569	2180	2298	2648	2357	1541	1177	520
	153	729	1615	2144	2272	2638	2312	1449	1186	545
	154	706	1689	2145	2205	2598	0	1481	1233	0
	155	704	1607	2121	2277	2586	2341	1667	1180	491
	156	735	1638	2086	2157	2629	2298	1494	0	541
	157	732	1698	2113	2245	2538	2372	1473	1173	0
	158	692	1638	2136	2195	2544	2313	0	1160	463
	159	708	1552	2062	2237	2456	2191	1544	1155	0
	160	707	1623	2165	2127	2554	2265	1592	1163	491
	161	709	1595	1993	2138	2383	0	1537	0	466
	162	742	1602	2017	2133	2404	2231	1480	1149	0
	163	691	1583	2080	2129	2362	2160	1509	1156	449
	164	746	1509	1983	2069	2337	2274	1512	1149	495
	165	719	1534	2079	2115	2206	2207	0	0	0
	166	736	1497	1960	2045	2312	2124	1477	1203	444
	167	690	1504	1921	2084	2178	2114	1422	1129	0
	168	705	1574	1945	2050	2186	0	1458	1133	400
	169	728	1490	1936	2017	2129	2124	1368	1111	452
	170	0	0	0	0	0	2088	1387	0	0
	171	702	1488	1935	2036	2159	2076	1388	1101	418
	172	716	1478	1952	1982	2065	2016	1462	1087	412
	173	746	1442	1990	1945	2097	1994	0	1068	0
	174	695	1464	1860	1972	2034	1994	1426	1068	428
	175	745	1424	1910	1850	1961	0	1414	0	0
	176	664	1458	1863	1882	1972	2018	1395	1066	431
	177	669	1408	1947	1836	1868	1865	1344	986	379
	178	685	1387	1836	1797	1792	2012	1361	1021	0
	179	661	1495	1775	1801	1783	1926	1353	1043	381
	180	667	1420	1847	1840	1789	1870	0	0	393
	181	696	1418	1791	1825	1742	0	1300	1056	0
	182	719	1372	1780	1792	1755	1824	1324	947	368
	183	642	1319	1812	1758	1665	1819	1276	956	0
	184	703	1341	1811	1638	1675	1743	1251	0	353
	185	688	1296	1742	1682	1596	1706	1208	932	354
	186	635	1300	1819	1763	1497	1694	1227	908	0
	187	670	1303	1711	1649	1518	1572	1296	907	349
	188	669	1257	1663	1608	1471	0	0	929	357
	189	642	1242	1679	1626	1503	1692	1185	0	0
	190	654	1311	1697	1594	1410	1644	1217	844	349
	191	636	1220	1731	1541	1394	1609	1157	912	0
	192	627	1281	1667	1511	1417	1639	1148	874	330
	193	620	1248	1613	1547	1323	1556	1124	869	335
	194	626	1153	1584	1467	1279	1480	1086	0	0
	195	613	1202	1602	1490	1259	0	0	824	321
	196	618	1200	1648	1475	1247	1449	1081	806	332
	197	593	1182	1650	1406	1157	1353	1056	792	0
	198	601	1114	1565	1370	1080	1454	1100	771	337
	199	633	1076	1483	1367	1079	1366	1061	0	0
	200	618	1086	1564	1348	1024	1350	996	728	291
	201	569	1085	1505	1364	1015	1317	949	725	294
	202	564	1087	1518	1274	983	0	965	744	0
	203	545	1046	1464	1222	964	1281	0	0	302
	204	596	1064	1417	1269	918	1226	888	684	306
	205	610	1065	1458	1241	840	1212	900	713	0
	206	534	1003	1436	1146	853	1188	874	734	310
	207	555	1015	1433	1144	793	1151	896	691	0
	208	536	981	1461	1130	768	0	799	0	296
	209	537	948	1430	1162	760	1121	839	656	319
	210	580	921	1407	1093	707	1082	0	659	0
	211	538	971	1353	1054	737	1046	756	645	303
	212	549	996	1406	1124	694	1057	760	651	278
	213	512	884	1252	1022	661	1032	753	0	0
	214	530	915	1244	1009	625	979	752	601	304
	215	522	835	1177	1020	548	0	769	574	0
	216	475	883	1199	957	520	949	731	621	290
	217	516	847	1163	947	556	892	708	572	278
	218	525	839	1196	918	510	929	0	0	0
	219	448	808	1176	940	478	880	642	580	254
	220	460	794	1145	885	469	836	646	567	273
	221	463	776	1064	913	420	831	672	552	0
	222	413	756	1103	788	410	0	631	0	274
	223	464	790	1018	799	366	801	577	518	0
	224	453	721	976	787	335	803	603	503	273
	225	433	698	1017	721	342	742	0	528	293
	226	464	693	958	697	358	702	524	483	0
	227	452	653	895	736	321	727	552	0	286
	228	389	601	870	710	291	707	521	504	239
	229	376	596	853	694	299	0	491	466	0
	230	415	595	785	684	249	616	472	442	265
	231	386	586	772	604	263	638	485	454	0
	232	356	568	737	578	244	588	470	0	254
	233	326	585	734	577	230	600	0	424	258
	234	330	484	732	540	217	564	429	439	0
	235	333	457	665	541	207	0	436	373	255
	236	360	444	621	529	177	559	446	382	226
	237	340	421	599	507	151	479	406	0	0
	238	288	403	608	517	145	499	410	405	219
	239	274	358	548	423	156	485	386	374	0
	240	274	361	552	439	135	462	0	349	218
	241	288	359	473	417	160	467	365	0	234
	242	261	340	477	384	125	0	372	338	0
	243	228	322	409	377	117	434	357	318	248
	244	229	261	462	342	119	408	325	357	212
	245	249	272	374	269	133	388	316	319	0
	246	188	237	357	299	105	361	315	0	226
	247	218	213	329	299	89	305	278	324	0
	248	203	181	319	277	99	306	0	290	222
	249	181	192	276	246	80	0	295	304	215
	250	179	154	260	228	83	325	261	259	0
	251	177	149	221	208	95	288	250	0	206
	252	139	140	199	185	91	284	225	237	213
	253	150	108	205	144	93	239	262	266	0
	254	115	106	155	171	63	227	197	236	195
	255	474	266	605	354	248	2599	2987	3309	5691

## Sheet: Series21
Bin procedure GFP histone images: Series 21
																Series							slice 2
	Count
	Value	Slice 2	Slice 3	Slice 4	Slice 5	Slice 6	Slice 7	Slice 8	Slice 9	Slice 10	Slice 11					Count	%						Count	%
	0	22590	38254	18893	27336	26144	13957	28285	42780	11378	7988
	1	0	9632	6782	12765	13051	9358	10908	10907	5902	3562			Background		2589794					Background		149323
	2	0	8941	6633	13565	12945	10362	10637	10033	5884	0
	3	11696	8332	6732	13402	12641	10187	10252	9535	0	3545			Interband		932870	47.7961				Interband		20881	52.7285
	4	0	0	6863	12928	11567	9845	9276	8983	5962	3391
	5	0	7662	6789	12000	10277	9006	8718	0	5810	0			Low Intensity		882316	45.2059				Low Intensity		10467	26.4312
	6	0	7381	6567	0	9210	8120	0	8574	5591	3217
	7	11794	6912	0	10704	0	0	7925	8205	0	0			High Intesity		136584	6.99796				High Intesity		8253	20.8404
	8	0	0	6177	9339	8247	7020	6964	7946	5630	3066
	9	0	6634	5790	8127	7459	6489	6319	7564	5476	2994					1951770	100						39601	100
	10	11504	6230	5192	7102	6742	5740	6207	0	5248	0
	11	0	5848	4844	6002	6268	5098	5601	7576	0	2952
	12	0	5409	4487	5383	5641	4768	5496	7263	5516	3009
	13	0	0	4108	0	5465	4461	0	7155	5437	0												Slice 3
	14	10529	5161	0	4567	4912	0	5175	6812	5422	3230			Summary
	15	0	4774	3974	4117	0	4245	4935	0	0	0		Series		Interband		Low int.		High int.				Count	%
	16	0	4393	3488	3671	4580	3988	4685	6805	5548	3376
	17	9529	0	3313	3298	4452	3925	4716	6584	5554	3655		4		59		36		4		Background		197648
	18	0	4103	3151	2980	4338	3736	4471	6470	5387	0		12		57		38		5
	19	0	3807	3015	0	4046	3682	4266	6231	0	3955		14		58		38		4		Interband		40129	44.1677
	20	0	3314	2843	2758	3912	3540	0	0	5675	4199		17		50		45		5
	21	8353	3078	0	2511	3872	0	4102	6006	5698	0		19		54		40		6		Low Intensity		38608	42.4936
	22	0	0	2625	2520	3815	3512	3938	5870	5695	4505		21		48		45		7
	23	0	2842	2443	2417	0	3408	3971	5760	0	0		23		48		46		6		High Intesity		12119	13.3387
	24	7254	2633	2457	2404	3736	3366	3733	5654	5908	4808		25		47		48		5
	25	0	2414	2220	2411	3621	3365	3744	5576	6082	4919		32		50		44		6				90856	100
	26	0	0	2161	0	3709	3147	0	0	6101	0		34		45		49		6
	27	0	2273	2115	2440	3664	3152	3643	5409	0	5394
	28	6495	2115	0	2412	3698	2870	3696	5314	6054	5368		Mean		51.6		42.9		5.4
	29	0	1894	2086	2337	3751	0	3703	5207	6209	0		SD		4.75815		4.32319		0.916515				Slice 4
	30	0	1857	1894	2364	3715	2911	3632	5047	6276	5657
	31	5879	0	1786	2318	0	2819	3513	0	0	0												Count	%
	32	0	1739	1760	0	3673	2767	3576	5171	6045	5661
	33	0	1673	1713	2377	3718	2618	0	4827	5845	5713										Background		188565
	34	0	1580	1592	2344	3754	2659	3516	4873	0	0
	35	5210	0	0	2301	3795	2644	3521	4840	5996	5689										Interband		82704	48.6637
	36	0	1511	1592	2325	3658	0	3520	0	5733	0
	37	0	1422	1566	2375	3657	2450	3400	4788	5617	5699										Low Intensity		75055	44.163
	38	4730	1350	1535	2349	3593	2619	3379	4655	0	5520
	39	0	1291	1508	0	0	2543	3398	4562	5470	0										High Intesity		12191	7.17329
	40	0	0	1529	2356	3537	2511	0	4454	5320	5550
	41	0	1223	1417	2314	3503	2488	3213	0	5139	5319												169950	100
	42	4221	1254	0	2263	3557	2597	3164	4518	0	0
	43	0	1203	1377	2384	3439	0	3222	4454	4907	5093
	44	0	0	1392	2234	3297	2647	3109	4313	4724	0
	45	3897	1133	1407	0	3362	2537	3005	4226	4614	5152												Slice 5
	46	0	1126	1373	2301	3247	2592	2992	4141	0	5096
	47	0	1157	1327	2303	0	2547	0	0	4413	0												Count	%
	48	0	1061	1340	2265	3191	2595	2849	4167	4205	4777
	49	3636	0	0	2328	3134	2620	2861	4163	4180	4594										Background		277464
	50	0	1049	1380	2313	3167	2573	2899	4111	0	0
	51	0	997	1274	2249	3157	0	2789	3970	3961	4578										Interband		110726	46.2801
	52	3260	1019	1342	0	2953	2649	2809	0	3929	0
	53	0	0	1321	2279	3047	2613	0	3943	3733	4302										Low Intensity		112112	46.8594
	54	0	984	1341	2187	2940	2546	2718	3931	0	4210
	55	0	1006	1264	2171	0	2680	2728	3822	3691	0										High Intesity		16414	6.86055
	56	2924	987	0	2184	2892	2704	2686	3772	3552	3988
	57	0	958	1271	2192	2865	2568	2777	0	3462	3970												239252	100
	58	0	0	1280	2045	2725	0	2664	3832	0	0
	59	2808	911	1255	0	2843	2622	2629	3664	3177	3698
	60	0	908	1263	2135	2643	2602	0	3657	3292	0
	61	0	930	1260	2179	2736	2564	2664	3577	3078	3697												Slice 6
	62	0	0	1265	2163	2641	2599	2637	0	0	3582
	63	2623	964	0	2077	0	2570	2693	3487	3131	0												Count	%
	64	0	847	1283	2128	2625	2564	2613	3482	2930	3331
	65	0	880	1274	0	2511	0	2517	3497	0	0										Background		324325
	66	2457	888	1292	1992	2468	2560	2565	3488	3057	3301
	67	0	0	1268	2075	2409	2507	0	0	2756	3064										Interband		117999	44.7782
	68	0	872	1241	2036	2352	2622	2611	3564	2739	0
	69	0	830	1263	2050	2404	2576	2676	3468	0	3032										Low Intensity		128594	48.7988
	70	2171	829	1293	2035	2361	2564	2599	3436	2627	3036
	71	0	0	0	2035	0	2473	2566	3267	2542	0										High Intesity		16926	6.42307
	72	0	815	1178	0	2268	2510	2528	3339	2496	2786
	73	2089	748	1217	2012	2199	0	2513	0	0	0												263519	100
	74	0	836	1292	2020	2204	2563	0	3280	2364	2694
	75	0	775	1227	2037	2257	2446	2565	3301	2321	2626
	76	0	0	1206	1970	2055	2487	2559	3148	2299	0												Slice 7
	77	1902	773	1190	2028	2091	2458	2484	3148	0	2522
	78	0	804	0	0	2004	2414	2410	0	2270	2481												Count	%
	79	0	819	1271	2002	0	2486	2552	3015	2113	0
	80	1772	0	1179	2017	2011	0	0	2971	2010	2395										Background		268875
	81	0	791	1252	1924	1980	2433	2463	3009	0	0
	82	0	812	1267	1932	1924	2411	2504	2885	2061	2270										Interband		164524	49.0325
	83	0	792	1240	1880	1960	2478	2400	0	1997	2236
	84	1621	762	1292	1864	1957	2436	2413	2927	1998	0										Low Intensity		153200	45.6576
	85	0	0	0	0	1883	2465	2502	2826	0	2192
	86	0	805	1301	1911	1833	2593	2450	2730	1894	2124										High Intesity		17817	5.30993
	87	1548	810	1282	1958	0	0	0	2716	1795	0
	88	0	803	1271	1830	1864	2430	2452	0	1756	1974												335541	100
	89	0	0	1282	1933	1843	2388	2473	2702	0	0
	90	0	810	1210	1902	1878	2530	2561	2574	1734	1908
	91	1366	797	1285	0	1827	2471	2532	2604	1737	1835
	92	0	787	0	1892	1839	2458	2446	2523	1668	0												Slice 8
	93	0	774	1268	1903	1725	2543	2475	2402	0	1732
	94	1311	0	1309	1898	1794	2540	0	0	1657	1777												Count	%
	95	0	760	1324	1959	0	0	2475	2409	1668	0
	96	0	788	1256	2045	1799	2514	2406	2349	0	1772										Background		304654
	97	0	818	1346	1936	1879	2510	2482	2286	1606	0
	98	1242	0	1324	0	1758	2533	2533	2341	1635	1558										Interband		150281	45.9738
	99	0	791	0	1948	1797	2555	2492	0	1596	1454
	100	0	833	1314	1955	1822	2624	2506	2243	0	0										Low Intensity		159463	48.7827
	101	1231	782	1302	1893	1810	2686	0	2103	1602	1524
	102	0	800	1325	1938	1802	0	2560	2174	1536	0										High Intesity		17140	5.24345
	103	0	0	1341	2028	0	2593	2538	2196	1549	1425
	104	0	745	1346	1880	1796	2608	2567	0	0	1340												326884	100
	105	1144	769	1402	0	1940	2666	2590	2122	1539	0
	106	0	751	0	1960	1838	2755	2578	2168	1465	1300
	107	0	0	1378	1974	1804	2733	0	2117	1468	1300
	108	1111	797	1386	1980	1914	2748	2593	2078	0	0												Slice 9
	109	0	813	1352	1950	1917	0	2523	0	1479	1216
	110	0	778	1505	1956	1939	2736	2546	2065	1416	0												Count	%
	111	0	771	1431	0	0	2721	2578	2130	1379	1227
	112	1108	0	1369	1990	1868	2828	2656	2211	0	1137										Background		381482
	113	0	779	0	1947	1955	2895	2678	2126	1460	0
	114	0	828	1463	1949	2044	2846	0	0	1455	1129										Interband		121545	50.1086
	115	1057	797	1492	1989	1943	3003	2679	2118	1390	1077
	116	0	0	1504	1965	1915	2944	2654	2071	0	0										Low Intensity		107889	44.4788
	117	0	815	1471	1976	2002	0	2653	2174	1451	1052
	118	0	804	1423	0	2004	2948	2591	2154	1425	0										High Intesity		13129	5.41261
	119	1010	811	1466	2034	0	3021	2840	2163	1354	1000
	120	0	766	0	2027	2031	3040	2675	0	0	917												242563	100
	121	0	0	1520	1996	2056	3003	0	2071	1454	0
	122	977	810	1487	1954	2069	3054	2753	2128	1422	912
	123	0	813	1553	2060	2099	3100	2738	2192	1373	874
	124	0	810	1564	0	2144	0	2664	2189	0	0												Slice 10
	125	0	0	1519	1959	2203	3014	2730	0	1394	917
	126	999	820	1584	1982	2211	3191	2766	2141	1435	0												Count	%
	127	0	787	0	1994	0	3038	0	2211	0	862
	128	0	781	1606	2021	2174	3162	2868	2192	1353	838										Background		285242
	129	949	778	1556	1934	2163	3276	2910	2187	1439	0
	130	0	0	1565	2089	2192	3116	2773	0	1480	800										Interband		74851	47.3411
	131	0	711	1553	0	2121	0	2809	2255	0	0
	132	0	801	1552	1995	2215	3264	2835	2347	1361	737										Low Intensity		70395	44.5228
	133	931	782	1650	2050	2235	3213	2818	2189	1442	727
	134	0	0	1574	1999	2243	3259	0	2231	1382	0										High Intesity		12864	8.13611
	135	0	810	0	2049	0	3235	2888	0	0	772
	136	844	804	1611	2009	2295	3061	3006	2307	1404	778												158110	100
	137	0	794	1686	0	2271	3238	2932	2282	1466	0
	138	0	770	1596	2007	2258	0	2865	2360	1418	706
	139	0	0	1598	1947	2268	3317	2949	2258	0	0
	140	823	775	1521	2060	2374	3266	2948	2295	1468	702												slice 11
	141	0	781	1579	2081	2279	3266	0	0	1458	680
	142	0	735	0	2048	2379	3253	2941	2338	1502	0												Count	%
	143	800	0	1651	2059	0	3289	2947	2269	0	661
	144	0	740	1648	0	2353	3280	2985	2234	1487	710										Background		212216
	145	0	743	1523	2061	2304	3216	3028	2325	1427	0
	146	0	767	1613	2044	2309	0	2992	0	1542	690										Interband		49230	124.315
	147	809	781	1564	2051	2369	3312	3039	2324	0	0
	148	0	0	1571	2027	2435	3262	0	2418	1435	658										Low Intensity		26533	67.0008
	149	0	780	0	2087	2333	3189	3066	2376	1529	634
	150	720	758	1633	0	2329	3247	3020	2400	1505	0										High Intesity		9731	24.5726
	151	0	771	1610	2057	0	3264	3130	0	0	663
	152	0	0	1633	1997	2369	3227	3107	2383	1464	636												85494	215.888
	153	0	823	1603	2051	2305	0	3144	2339	1513	0
	154	699	740	1579	2077	2302	3192	0	2374	1483	652
	155	0	774	1642	2007	2405	3101	3026	2317	0	0
	156	0	751	0	2005	2313	3176	3051	0	1520	608
	157	668	0	1581	0	2360	3224	3125	2387	1506	634
	158	0	748	1604	2040	2352	3192	3040	2370	1433	0
	159	0	701	1574	2103	0	3063	3020	2286	0	608
	160	0	783	1553	1993	2261	0	3148	2214	1504	0
	161	634	0	1590	2064	2455	3131	0	0	1463	660
	162	0	779	1515	2112	2356	3222	3082	2288	0	631
	163	0	728	0	2074	2300	3086	3098	2212	1508	0
	164	617	778	1527	0	2385	2941	3137	2317	1470	638
	165	0	741	1524	1946	2244	2992	3006	2218	1414	573
	166	0	0	1473	2076	2294	2916	3010	2287	0	0
	167	0	699	1420	2000	0	2862	3057	0	1407	603
	168	590	759	1572	2016	2382	0	0	2208	1460	0
	169	0	730	1480	2028	2223	2827	3127	2220	1520	572
	170	0	0	0	0	2357	2949	3071	2183	0	646
	171	543	704	1484	1989	2290	2824	3066	2219	1478	0
	172	0	743	1397	1998	2324	2882	2999	0	1429	598
	173	0	732	1413	1966	2330	2806	3048	2192	1463	594
	174	0	750	1377	2062	2251	2794	3008	2188	0	0
	175	553	0	1375	2014	0	0	0	2178	1435	655
	176	0	761	1394	2039	2215	2768	2962	2102	1451	0
	177	0	759	0	0	2278	2658	2999	0	1453	571
	178	541	720	1332	2015	2213	2634	2883	2103	0	615
	179	0	0	1307	1980	2242	2618	2853	2121	1457	0
	180	0	723	1322	2009	2235	2561	2802	2100	1442	560
	181	0	707	1243	1977	2154	2519	0	2051	1410	590
	182	520	683	1284	1961	2190	0	2820	0	0	0
	183	0	679	1306	0	0	2551	2790	2003	1422	587
	184	0	0	0	2027	2178	2542	2790	1958	1336	0
	185	471	672	1210	1962	2166	2528	2832	1923	1405	573
	186	0	683	1232	1937	2124	2477	2656	1900	0	558
	187	0	698	1151	1858	2021	2329	2688	1891	1376	0
	188	0	0	1170	1871	2107	2352	0	0	1314	550
	189	416	665	1172	1818	2061	2282	2595	1862	1330	600
	190	0	668	1090	0	2021	0	2608	1866	0	0
	191	0	646	0	1822	0	2247	2568	1839	1343	538
	192	403	696	1143	1861	1969	2303	2413	1746	1262	0
	193	0	0	1059	1834	1979	2160	2425	0	0	584
	194	0	615	1043	1777	1940	2163	2423	1779	1179	590
	195	0	602	1055	1811	1957	2124	0	1677	1275	0
	196	410	591	984	0	1841	2098	2366	1549	1233	578
	197	0	0	942	1735	1878	0	2283	1566	0	0
	198	0	565	981	1649	1826	2088	2239	0	1230	536
	199	386	613	0	1724	0	1985	2299	1526	1123	568
	200	0	657	922	1631	1835	1917	2138	1465	1185	0
	201	0	585	949	1651	1755	1977	2053	1459	0	520
	202	0	0	925	1599	1709	1886	0	1424	1165	568
	203	341	554	843	0	1669	1772	2052	0	1052	0
	204	0	605	895	1575	1628	0	2006	1397	1089	541
	205	0	554	888	1599	1680	1779	1929	1325	0	0
	206	391	0	0	1547	1498	1677	1837	1275	1036	542
	207	0	570	853	1493	0	1707	1794	1281	1031	514
	208	0	569	800	1391	1536	1638	0	0	980	0
	209	0	600	786	1352	1565	1662	1695	1176	0	467
	210	345	530	748	0	1605	1595	1684	1159	972	491
	211	0	0	740	1377	1481	1498	1617	1128	973	0
	212	0	530	715	1350	1475	0	1561	1098	897	529
	213	299	514	0	1368	1350	1536	1509	1009	0	0
	214	0	529	717	1240	1333	1437	1538	0	884	484
	215	0	0	729	1169	0	1382	0	998	871	467
	216	0	512	669	0	1347	1293	1441	1011	811	0
	217	332	524	646	1124	1236	1294	1348	900	0	496
	218	0	451	644	1129	1265	1272	1361	869	844	425
	219	0	438	621	1098	1200	0	1326	0	777	0
	220	286	0	0	1049	1168	1236	1237	847	812	469
	221	0	437	629	997	1107	1172	1218	794	0	0
	222	0	451	602	1012	1039	1115	0	765	730	406
	223	0	480	567	0	0	1161	1144	791	741	411
	224	302	0	588	932	998	1100	1095	0	0	0
	225	0	447	548	926	1033	1045	1106	685	678	377
	226	0	430	514	832	876	0	1008	704	686	0
	227	260	414	0	873	901	1029	971	622	657	396
	228	0	391	497	824	914	918	888	604	0	376
	229	0	0	492	0	810	941	0	0	601	0
	230	0	389	469	780	818	924	827	572	560	407
	231	235	416	489	762	0	838	805	595	564	374
	232	0	354	474	735	784	843	811	565	0	0
	233	0	0	411	691	781	795	776	513	539	411
	234	258	407	0	592	742	0	714	485	528	0
	235	0	354	406	614	711	727	0	0	498	348
	236	0	331	438	0	668	697	653	464	0	314
	237	0	349	397	590	604	676	675	465	428	0
	238	259	0	365	579	559	619	615	404	437	303
	239	0	332	379	566	0	561	500	387	419	345
	240	0	332	381	511	539	533	549	0	0	0
	241	214	338	0	511	493	0	527	363	405	289
	242	0	0	345	0	465	541	0	392	411	0
	243	0	336	356	444	430	489	499	348	348	266
	244	0	312	337	425	431	487	446	323	0	311
	245	236	286	331	414	397	462	447	0	348	0
	246	0	288	303	409	352	421	366	302	333	277
	247	0	0	306	368	0	418	362	310	286	242
	248	200	253	0	344	346	0	314	277	0	0
	249	0	292	290	0	326	342	0	258	298	240
	250	0	234	261	306	283	342	331	0	249	0
	251	0	0	246	299	240	362	288	262	258	256
	252	238	248	217	303	260	273	237	236	0	235
	253	0	208	223	251	225	261	253	221	236	0
	254	0	260	197	256	217	255	205	210	251	240
	255	6353	4118	2519	2209	1721	2018	1967	2562	2846	3724

## Sheet: Series23
Bin procedure GFP histone images: Series 23
															Series							slice 2
	Count
	Value	Slice 2	Slice 3	Slice 4	Slice 5	Slice 6	Slice 7	Slice 8	Slice 9	Slice 10					Count	%						Count	%
	0	3105	18	43	1174	1644	1724	1167	179	2
	1	2814	771	1422	6340	9809	11879	5524	2181	79			Background		2063644					Background		126016
	2	3663	1526	3747	6949	7453	11014	5597	0	0
	3	4291	2613	6351	8061	7713	10122	0	3088	258			Interband		1087213	48.4463				Interband		48450	45.7399
	4	4660	3725	8342	8118	0	9501	5521	3885	0
	5	0	0	9392	8082	8097	0	5035	0	576			Low Intensity		1029288	45.8652				Low Intensity		46402	43.8065
	6	4814	4753	9962	0	8485	8858	4753	4259	921
	7	4889	5525	0	7648	8520	8517	0	4264	0			High Intesity		127659	5.6885				High Intesity		11073	10.4536
	8	4623	5916	9873	7021	8706	8351	4237	0	1264
	9	4404	5872	9109	6355	0	8240	3712	4152	0					2244160	100						105925	100
	10	0	5420	8548	5701	8384	0	3429	4045	1552
	11	4121	0	7603	5349	7969	8020	0	0	0
	12	3847	5121	6805	0	7636	7737	3182	4084	1905
	13	3508	4613	6248	5122	7097	7491	2878	4061	2191												Slice 3
	14	3425	4253	5313	4735	0	7089	0	0	0			Summary
	15	0	3698	0	4512	6525	0	2823	3919	2481		Series		Interband		Low int.		High int.				Count	%
	16	3010	0	4992	4236	5900	6708	2868	4035	0
	17	2846	3509	4404	4136	5412	6536	2713	0	2640		4		59		36		4		Background		141480
	18	2608	3112	4080	0	4975	6423	0	4133	0		12		57		38		5
	19	2613	2879	3551	3863	0	5944	2800	4181	3114		14		58		38		4		Interband		73831	40.0359
	20	0	2652	3269	3978	4657	0	2990	0	3495		17		50		45		5
	21	2329	2516	2968	3719	4147	5846	3239	4380	0		19		54		40		6		Low Intensity		95617	51.8497
	22	2232	0	0	3558	3862	5655	0	4386	3906		21		48		45		7
	23	2161	2343	2781	3450	3687	5639	3624	0	0		23		48		46		6		High Intesity		14964	8.11444
	24	2033	2172	2525	0	0	5374	3981	4702	4397		25		47		48		5
	25	0	2144	2438	3456	3676	0	0	4729	5004		32		50		44		6				184412	100
	26	1978	1972	2356	3415	3577	5192	4276	0	0		34		45		49		6
	27	1845	0	2242	3436	3323	5089	4620	4893	5706
	28	1718	1867	2215	3286	3287	5193	4876	5132	0		Mean		51.6		42.9		5.4
	29	1680	1846	2248	3244	0	5125	0	0	6261		SD		4.75815		4.32319		0.916515				Slice 4
	30	0	1784	0	0	3302	0	5274	5392	0
	31	1629	1723	2131	3241	3125	5128	5434	0	6775												Count	%
	32	1546	1665	2208	3146	3412	5041	5507	5574	7366
	33	1538	0	2238	3089	3345	5067	0	5751	0										Background		238145
	34	1402	1580	2288	3051	0	5093	5802	0	7725
	35	0	1576	2316	2905	3319	0	5849	5765	0										Interband		121730	49.9378
	36	1450	1553	2319	0	3274	4973	5983	5892	8251
	37	1347	1533	0	2843	3426	4912	0	0	0										Low Intensity		108612	44.5564
	38	1293	0	2279	2792	3352	4895	5824	6032	8309
	39	1292	1527	2334	2654	0	4859	5753	5768	8421										High Intesity		13421	5.50576
	40	0	1496	2403	2675	3322	0	0	0	0
	41	1212	1442	2466	2505	3414	4734	5494	5765	8267												243763	100
	42	1184	1358	2459	0	3315	4894	5397	5728	0
	43	1160	1540	2445	2495	3469	4681	5157	0	8183
	44	1265	0	2523	2442	0	4615	0	5557	8085
	45	1200	1485	0	2464	3377	0	5011	5397	0												Slice 5
	46	0	1424	2531	2339	3221	4563	4950	0	7716
	47	1200	1502	2459	2295	3420	4535	4694	5342	0												Count	%
	48	1200	1452	2491	0	3429	4525	0	5078	7367
	49	1154	1455	2584	2181	0	4470	4510	0	0										Background		227092
	50	1205	0	2544	2123	3443	0	4342	5004	7011
	51	0	1386	2575	2189	3389	4410	0	4684	6789										Interband		151312	45.1626
	52	1142	1427	0	2041	3285	4423	4139	0	0
	53	1190	1336	2469	2002	3276	4331	4030	4476	6429										Low Intensity		166037	49.5577
	54	1098	1419	2655	0	0	4085	3925	4391	0
	55	1016	0	2509	1910	3287	0	0	0	5987										High Intesity		17689	5.2797
	56	0	1349	2535	1941	3250	4003	3881	4220	0
	57	1037	1361	2449	2027	3343	4034	3807	3924	5695												335038	100
	58	1027	1343	2478	2043	3168	3974	3653	0	5520
	59	1132	1387	2416	1928	0	3971	0	3908	0
	60	1004	1385	0	0	3179	0	3393	3609	5198
	61	0	0	2413	1937	3175	3831	3418	0	0												Slice 6
	62	1032	1402	2349	1930	3189	3780	3249	3559	4998
	63	987	1301	2315	1846	0	3837	0	0	0												Count	%
	64	995	1245	2332	1866	3103	3726	3248	3546	4617
	65	980	1327	2240	1869	3166	0	3225	3348	4488										Background		282809
	66	0	0	2248	1917	3110	3686	0	0	0
	67	942	1329	0	0	3120	3709	3129	3118	4354										Interband		170186	49.6257
	68	930	1211	2264	1870	0	3530	3219	3179	0
	69	923	1285	2252	1785	3111	3535	3122	0	4159										Low Intensity		156427	45.6137
	70	916	1210	2207	1907	3139	0	0	3128	3945
	71	0	1251	2208	1990	2946	3462	3201	3054	0										High Intesity		16326	4.76061
	72	957	0	2195	1978	3026	3393	2917	0	3859
	73	911	1245	2260	0	0	3543	3125	2923	0												342939	100
	74	942	1172	2059	1973	2991	3544	0	2976	3638
	75	947	1201	0	1901	2928	0	3063	0	0
	76	0	1181	2172	1973	3019	3353	3067	2784	3515												Slice 7
	77	850	0	2130	1975	3032	3471	0	2774	3406
	78	870	1106	2220	1964	0	3319	3208	0	0												Count	%
	79	906	1159	2078	0	3034	3410	3011	2750	3375
	80	891	1127	2132	2089	2995	0	3147	2762	0										Background		351207
	81	0	1210	2140	2022	3012	3295	0	0	3081
	82	897	1194	0	2035	3030	3300	3161	2604	0										Interband		173322	53.1138
	83	851	0	2077	2060	0	3200	3201	2671	3213
	84	896	1136	2104	2036	3011	3222	3134	0	3075										Low Intensity		138737	42.5154
	85	913	1134	2123	0	2918	0	0	2606	0
	86	860	1182	2043	2076	2967	3198	3147	2704	2953										High Intesity		14263	4.37084
	87	0	1270	2040	2055	2957	3173	3152	0	0
	88	882	1162	1940	2166	0	3164	3137	2669	2913												326322	100
	89	875	0	2093	2148	2968	3186	0	2655	2944
	90	856	1208	0	2242	2960	0	3226	0	0
	91	855	1139	1991	0	3100	3090	3211	2668	2705
	92	0	1211	2033	2195	2998	3073	0	2701	0												Slice 8
	93	925	1227	1995	2153	0	3041	3183	0	2717
	94	916	0	2025	2160	3072	3179	3096	2595	0												Count	%
	95	848	1203	2033	2331	3066	0	3218	0	2667
	96	817	1148	1925	2336	3077	3053	0	2663	2513										Background		246164
	97	0	1199	0	0	3063	3095	3262	2592	0
	98	869	1158	1944	2177	0	3223	3226	0	2455										Interband		152982	49.9002
	99	872	1219	1979	2252	3011	3111	3216	2662	0
	100	889	0	1976	2451	3146	0	0	2586	2490										Low Intensity		137844	44.9624
	101	891	1173	1988	2395	3079	3089	3237	0	0
	102	0	1226	2032	2445	3051	3010	3225	2564	2372										High Intesity		15750	5.13739
	103	913	1224	2036	0	0	3062	0	2708	2233
	104	924	1231	2074	2489	3068	2971	3263	0	0												306576	100
	105	924	0	0	2529	3095	0	3256	2589	2270
	106	880	1177	2017	2464	3170	3189	3221	2526	0
	107	0	1250	2072	2607	3082	3107	0	0	2228
	108	896	1281	2027	2595	0	3182	3229	2519	2176												Slice 9
	109	953	1269	2005	0	3215	3107	3229	2597	0
	110	912	1210	2066	2549	3234	0	3285	0	2098												Count	%
	111	916	0	2092	2705	3215	3125	0	2612	0
	112	0	1230	0	2744	3248	3203	3205	2564	2008										Background		228450
	113	928	1250	2107	2615	0	3212	3160	0	0
	114	939	1289	2092	2768	3359	3211	3201	2559	1990										Interband		114414	45.4148
	115	900	1340	2020	0	3262	0	0	2616	1892
	116	907	0	2114	2694	3238	3231	3108	0	0										Low Intensity		123820	49.1484
	117	0	1331	2117	2762	3376	3291	3170	2563	1887
	118	906	1268	2138	2859	0	3222	0	2628	0										High Intesity		13697	5.43681
	119	906	1324	2047	2869	3390	3286	3118	0	1775
	120	905	1362	0	3010	3329	0	3281	2577	0												251931	100
	121	917	1342	2161	0	3375	3351	3196	2754	1820
	122	0	0	2074	2935	3398	3309	0	0	1817
	123	944	1423	2152	2990	0	3370	3187	2595	0
	124	950	1431	2108	3032	3347	3293	2999	2589	1814												Slice 10
	125	982	1420	2085	3136	3423	0	3149	0	0
	126	936	1451	2124	3128	3477	3363	0	2697	1699												Count	%
	127	0	0	0	0	0	3323	3114	0	0
	128	920	1395	2121	3075	3458	3404	3183	2664	1718										Background		222281
	129	949	1415	2152	3056	3506	3372	0	2659	1651
	130	925	1500	2190	3202	3545	0	3114	0	0										Interband		80986	54.9975
	131	935	1458	2178	3077	3400	3392	3184	2646	1610
	132	974	1546	2200	3162	0	3414	3236	2676	0										Low Intensity		55792	37.8883
	133	0	0	2223	3181	3543	3421	0	0	1642
	134	980	1539	2178	0	3589	3402	3210	2619	1612										High Intesity		10476	7.11424
	135	925	1594	0	3180	3523	0	3143	2722	0
	136	960	1642	2205	3224	3483	3469	3207	0	1591												147254	100
	137	922	1541	2195	3288	0	3495	0	2712	0
	138	0	1582	2089	3345	3447	3436	3135	2726	1514
	139	921	0	2227	3225	3475	3505	3155	0	0
	140	1000	1673	2235	0	3493	0	0	2808	1519
	141	956	1631	2220	3258	3554	3562	3141	2723	1470
	142	944	1692	2273	3338	0	3479	3178	0	0
	143	0	1628	0	3401	3496	3431	3167	2836	1516
	144	949	0	2226	3296	3413	3638	0	2890	0
	145	886	1734	2174	3305	3611	0	3303	0	1508
	146	937	1716	2178	0	3471	3377	3163	2781	0
	147	914	1733	2203	3283	0	3476	3221	2923	1516
	148	0	1714	2194	3258	3434	3534	0	0	1395
	149	949	1744	2269	3277	3399	3566	3322	2983	0
	150	911	0	0	3272	3482	0	3169	2887	1525
	151	981	1711	2228	3314	3391	3382	3214	0	0
	152	894	1761	2302	0	0	3470	0	2921	1550
	153	0	1786	2239	3303	3431	3415	3305	2873	1447
	154	949	1806	2207	3200	3453	3392	3241	0	0
	155	922	0	2218	3342	3447	0	0	2934	1405
	156	946	1785	2216	3225	3448	3540	3145	2943	0
	157	826	1830	2150	3190	0	3341	3162	0	1418
	158	0	1797	0	0	3437	3421	3206	2931	0
	159	895	1835	2245	3284	3428	3305	0	0	1387
	160	910	1744	2159	3253	3413	0	3206	2840	1429
	161	880	0	2196	3330	3445	3258	3140	2883	0
	162	908	1872	2247	3200	0	3298	3208	0	1448
	163	0	1800	2190	3298	3333	3268	0	2943	0
	164	892	1900	2155	0	3198	3264	3220	2957	1431
	165	864	1873	0	3261	3322	0	3147	0	0
	166	891	0	2035	3142	3241	3101	0	2946	1429
	167	884	1890	2175	3188	0	3033	3072	3132	1457
	168	0	1921	2082	3179	3265	3103	3007	0	0
	169	856	1866	2022	3218	3121	2930	3048	2966	1450
	170	854	1880	2120	0	3173	0	0	3045	0
	171	857	1895	2053	3201	3113	3076	3142	0	1363
	172	873	0	1964	3179	0	2966	2959	3035	1424
	173	846	1826	0	3203	3095	2972	2999	2860	0
	174	0	1863	2117	3202	3049	2893	0	0	1523
	175	892	1783	2017	3028	2987	0	2933	2885	0
	176	857	1761	2035	0	3007	2778	2912	2880	1413
	177	782	1809	1919	3042	0	2665	2893	0	0
	178	791	0	1873	3014	3041	2604	0	2876	1455
	179	0	1671	1903	3062	3007	2605	2780	2856	1418
	180	785	1842	0	3030	2905	0	2746	0	0
	181	832	1769	1947	3085	2976	2527	0	2869	1448
	182	841	1741	1810	0	0	2492	2846	2832	0
	183	791	0	1805	2943	2780	2376	2706	0	1404
	184	0	1726	1827	2856	2785	2358	2765	2671	0
	185	781	1669	1753	2914	2811	0	0	2769	1412
	186	762	1647	1715	2893	2781	2375	2704	0	1450
	187	789	1591	1789	2759	0	2230	2561	2732	0
	188	785	1650	0	0	2689	2260	2524	2719	1407
	189	0	0	1744	2807	2587	2197	0	0	0
	190	776	1578	1704	2724	2519	0	2541	2586	1405
	191	743	1679	1577	2689	0	2197	2439	0	0
	192	708	1551	1644	2719	2494	2103	0	2620	1398
	193	700	1601	1636	2635	2547	1981	2474	2505	1335
	194	0	0	1579	2591	2500	1936	2297	0	0
	195	720	1568	0	0	2405	0	2286	2474	1354
	196	735	1568	1571	2497	0	1878	0	2419	0
	197	692	1438	1527	2505	2342	1849	2147	0	1220
	198	708	1494	1516	2401	2366	1774	2268	2480	1250
	199	0	1345	1459	2462	2137	1763	2197	2385	0
	200	654	0	1406	2272	2190	0	0	0	1203
	201	721	1414	1338	0	0	1703	2188	2279	0
	202	638	1361	1303	2216	2120	1670	2037	2197	1171
	203	646	1406	0	2121	2146	1602	1984	0	0
	204	0	1351	1212	2185	2082	1542	0	2203	1157
	205	635	0	1226	2147	1964	0	1901	2037	1150
	206	612	1319	1236	2025	0	1493	1872	0	0
	207	614	1252	1177	0	1964	1492	0	2048	1077
	208	612	1250	1102	1968	1850	1420	1727	1933	0
	209	0	1210	1126	1888	1795	1397	1754	0	1045
	210	561	1224	0	1858	1765	0	1691	1879	0
	211	593	0	1082	1774	0	1352	0	1789	1056
	212	556	1176	1079	1810	1676	1247	1605	0	943
	213	553	1155	989	0	1656	1275	1584	1808	0
	214	554	1084	1007	1637	1545	1247	1538	1660	979
	215	0	1048	950	1520	1518	0	0	0	0
	216	564	1009	903	1597	0	1142	1492	1576	924
	217	562	0	910	1385	1419	1160	1442	1515	851
	218	536	933	0	1429	1292	1101	0	0	0
	219	543	952	894	0	1351	1030	1319	1408	853
	220	0	971	774	1293	1275	0	1301	1394	0
	221	547	935	775	1337	0	1115	1219	0	814
	222	486	0	732	1317	1185	961	0	1268	0
	223	488	896	770	1160	1172	914	1185	0	779
	224	469	805	682	1181	1112	932	1074	1189	735
	225	0	809	0	0	1046	0	1066	1114	0
	226	489	759	640	1143	0	894	0	0	677
	227	446	705	664	1073	1044	842	1036	1058	0
	228	462	0	634	1031	977	742	991	949	670
	229	459	663	577	968	915	762	940	0	0
	230	0	712	594	850	819	0	0	929	635
	231	428	659	531	0	0	667	904	887	578
	232	432	584	580	822	789	652	795	0	0
	233	392	0	0	790	762	664	0	750	579
	234	398	611	464	778	726	638	799	783	0
	235	0	552	500	686	701	0	767	0	503
	236	377	578	486	710	0	617	671	725	505
	237	407	498	441	0	677	543	0	596	0
	238	387	526	413	624	646	566	656	0	455
	239	311	0	407	664	559	505	593	625	0
	240	0	474	0	650	516	0	538	536	436
	241	333	459	395	537	0	496	0	0	0
	242	346	401	421	517	471	485	492	466	439
	243	357	431	364	0	461	415	457	437	432
	244	295	0	362	463	484	404	0	0	0
	245	0	400	326	409	394	0	484	408	405
	246	312	388	305	404	0	391	397	357	0
	247	280	335	305	394	385	326	387	0	358
	248	286	335	0	362	342	303	0	328	0
	249	231	314	286	0	329	314	363	322	362
	250	0	0	260	354	328	0	321	0	304
	251	223	284	276	263	0	284	304	271	0
	252	249	264	242	274	287	287	0	256	271
	253	207	264	238	270	276	247	286	0	0
	254	205	249	233	224	239	238	232	206	242
	255	2761	2710	2477	2429	2153	1981	2271	1694	2625

## Sheet: Series25
Bin procedure GFP histone images: Series 25
															Series							slice 2
	Count
	Value	Slice 2	Slice 3	Slice 4	Slice 5	Slice 6	Slice 7	Slice 8	Slice 9						Count	%						Count	%
	0	8755	0	954	219	1422	5073	2091	112
	1	0	102	12696	3583	8841	17669	10486	2319				Background		2082952					Background		155665
	2	7143	584	11652	6422	9810	8468	7688	3773
	3	0	1403	11917	8654	11103	6733	6808	0				Interband		1066040	47.242				Interband		27600	51.6709
	4	8857	2565	12153	9888	12148	6351	6438	4722
	5	0	4022	12499	10931	12304	6185	0	5157				Low Intensity		1076364	47.6995				Low Intensity		16990	31.8075
	6	9792	5357	12761	10784	11907	6217	6123	5358
	7	0	6655	0	10363	10687	5805	6299	0				High Intesity		114148	5.05851				High Intesity		8825	16.5216
	8	10019	7612	12473	9344	9210	0	6025	5332
	9	0	8183	11999	0	7738	5164	5789	5236						2256552	100						53415	100
	10	0	8632	11584	8241	6344	4931	5492	5241
	11	9707	8677	10717	7196	0	4557	0	0
	12	0	8706	9937	5932	5302	4079	5545	5035
	13	9100	8494	9391	5074	4546	3782	5189	4880				Summary									Slice 3
	14	0	8280	8613	4450	3813	3509	5000	0			Series		Interband		Low int.		High int.
	15	8363	8012	0	3864	3283	3102	4815	4723													Count	%
	16	0	7655	7815	3421	2920	2961	0	4577			4		59		36		4
	17	7475	7312	7356	3124	2655	0	4646	4545			12		57		38		5		Background		242160
	18	0	6720	6810	0	2346	2880	4652	0			14		58		38		4
	19	0	6310	6359	2829	2095	2814	4561	4350			17		50		45		5		Interband		75564	58.7535
	20	6831	6127	6233	2711	2059	2725	4461	4340			19		54		40		6
	21	0	5600	5679	2641	1882	2602	4444	4319			21		48		45		7		Low Intensity		49526	38.5081
	22	6184	5199	5369	2544	0	2674	0	0			23		48		46		6
	23	0	4808	0	2589	1737	2624	4555	4234			25		47		48		5		High Intesity		3522	2.73847
	24	5481	4598	5251	2558	1680	2691	4483	4129			32		50		44		6
	25	0	4084	5161	2554	1735	2653	4431	0			34		45		49		6				128612	100
	26	4932	3764	4809	2610	1845	0	4378	4388
	27	0	3577	4590	2617	1778	2765	0	4187			Mean		51.6		42.9		5.4
	28	0	3359	4467	0	1824	2740	4382	4249			SD		4.75815		4.32319		0.916515
	29	4407	3054	4210	2665	1818	3030	4319	0													Slice 4
	30	0	2966	4052	2707	1965	2975	4233	4350
	31	4104	2875	0	2673	2027	3081	4153	4465													Count	%
	32	0	2629	3762	2855	2094	3200	4034	4504
	33	3701	2456	3490	2749	0	3221	0	0											Background		313538
	34	0	2352	3243	2848	2247	3412	3953	4411
	35	3421	2276	3085	2831	2340	0	3846	4657											Interband		116050	40.4636
	36	0	2187	2969	2911	2541	3392	3750	4695
	37	0	2086	2809	0	2649	3453	3640	0											Low Intensity		152336	53.1156
	38	3154	1974	0	2893	2759	3538	0	4726
	39	0	1936	2638	2901	2870	3515	3500	4794											High Intesity		18415	6.42083
	40	2850	2004	2394	2868	3037	3552	3598	0
	41	0	1885	2328	2824	3085	3647	3390	4861													286801	100
	42	2788	1885	2212	2862	3388	3652	3462	4759
	43	0	1738	2147	2993	3318	3670	3291	4902
	44	2566	1745	2065	2837	0	0	0	0
	45	0	1608	1962	2789	3592	3504	3246	4894													Slice 5
	46	0	1671	0	2817	3537	3500	3377	4882
	47	2431	1620	1933	0	3618	3592	3144	4922													Count	%
	48	0	1536	1871	2770	3632	3471	3129	0
	49	2292	1562	1730	2869	3651	3543	3059	4829											Background		274974
	50	0	1537	1682	2780	3595	3520	0	4840
	51	2169	1506	1730	2794	3658	3381	3082	0											Interband		177499	48.0246
	52	0	1425	1657	2816	3684	0	3014	4855
	53	2007	1435	1566	2787	3773	3433	3062	4783											Low Intensity		173780	47.0184
	54	0	1435	0	2756	3710	3511	3046	4594
	55	0	1412	1663	2805	0	3328	0	0											High Intesity		18321	4.95698
	56	1902	1423	1588	0	3687	3364	2899	4576
	57	0	1380	1538	2772	3593	3330	2873	4559													369600	100
	58	1783	1359	1595	2798	3541	3374	2906	4238
	59	0	1327	1470	2764	3567	3334	2846	0
	60	1670	1277	1613	2892	3360	3267	2704	4222
	61	0	1254	1544	2812	3374	0	0	4164													Slice 6
	62	1554	1277	0	2766	3386	3266	2764	4057
	63	0	1299	1521	2906	3402	3201	2622	0													Count	%
	64	0	1279	1529	2918	3193	3207	2697	3776
	65	1542	1261	1558	2794	3333	3241	2656	3797											Background		294049
	66	0	1233	1519	0	0	3118	0	0
	67	1450	1184	1437	2926	3160	3226	2697	3696											Interband		181218	45.6022
	68	0	1208	1582	2861	3122	3144	2638	3644
	69	1394	1215	0	2968	3089	3128	2659	3506											Low Intensity		198076	49.8444
	70	0	1206	1530	2850	3128	0	2542	0
	71	1280	1207	1549	2942	3092	3017	2657	3353											High Intesity		18095	4.55347
	72	0	1220	1586	2979	2914	3002	0	3275
	73	0	1201	1552	2948	2864	3009	2527	3331													397389	100
	74	1196	1201	1581	3026	2950	3025	2603	0
	75	0	1116	1569	0	2806	2890	2552	3214
	76	1167	1127	1481	2885	2881	2885	2668	3132													Slice 7
	77	0	1118	0	2861	0	2849	0	0
	78	1123	1186	1561	2955	2763	2796	2612	3008													Count	%
	79	0	1126	1538	2938	2902	0	2525	2952
	80	1075	1119	1502	2955	2797	2878	2537	2855											Background		277935
	81	0	1073	1633	2978	2755	2768	2535	0
	82	0	1092	1519	2937	2788	2741	2620	2899											Interband		188038	47.8989
	83	1058	1051	1568	2939	2699	2857	0	2782
	84	0	1146	1588	3042	2691	2842	2653	2823											Low Intensity		186377	47.4758
	85	1057	1018	0	0	2646	2867	2580	0
	86	0	1068	1635	2901	2723	2695	2608	2771											High Intesity		18158	4.62538
	87	994	1025	1650	2960	2667	2747	2659	2819
	88	0	1040	1641	2985	2732	0	2679	2754													392573	100
	89	985	1122	1733	2886	0	2777	0	0
	90	0	1123	1603	2877	2664	2726	2658	2670
	91	0	1092	1673	2911	2787	2815	2619	2697
	92	982	1051	1724	3015	2755	2842	2618	0													Slice 8
	93	0	1064	0	2844	2726	2724	2692	2756
	94	966	1054	1685	0	2740	2713	0	2650													Count	%
	95	0	1018	1800	2859	2717	2773	2710	2728
	96	1017	1004	1723	2999	2820	2711	2739	0											Background		267448
	97	0	1042	1719	2962	2805	0	2783	2586
	98	976	1038	1768	2980	2785	2769	2816	2602											Interband		169172	45.9563
	99	0	978	1749	2901	2840	2860	2804	2605
	100	0	1043	0	2995	0	2823	0	0											Low Intensity		182174	49.4883
	101	980	1051	1805	2920	2795	2844	2858	2649
	102	0	1088	1848	2884	2766	2829	2889	2612											High Intesity		16769	4.55537
	103	952	1123	1784	2984	2860	2815	2766	0
	104	0	1105	1850	0	2892	2957	3004	2690													368115	100
	105	966	1079	1860	2894	2803	0	0	2688
	106	0	1086	1879	2872	2831	2861	2950	2743
	107	970	1065	1939	2931	2907	2887	3017	0
	108	0	1077	0	2946	2888	2950	2917	2721													Slice 9
	109	0	1113	1910	2984	2850	2885	3083	2689
	110	920	1122	1891	2993	2861	3060	3066	2658													Count	%
	111	0	1066	1934	2954	0	3074	0	0
	112	898	1144	1921	2932	2777	2961	3155	2765											Background		257183
	113	0	1164	1997	0	2986	3075	3102	2761
	114	886	1131	2010	3043	2898	0	3204	2729											Interband		130899	50.3367
	115	0	1194	1961	3092	2922	3117	3196	0
	116	943	1176	0	3015	2929	3055	0	2734											Low Intensity		117105	45.0322
	117	0	1112	1997	3086	2994	3137	3095	2732
	118	0	1164	2030	2886	2991	3131	3168	0											High Intesity		12043	4.63109
	119	890	1153	2017	2972	2950	3191	3243	2678
	120	0	1201	2078	2976	3067	3155	3254	2718													260047	100
	121	930	1144	2080	2962	3038	3151	3315	2739
	122	0	1181	2171	3037	0	3262	0	0
	123	933	1149	2076	0	3117	0	3278	2683
	124	0	1199	0	3110	3067	3303	3281	2789
	125	920	1156	2174	2989	3124	3237	3332	2790
	126	0	1219	2266	3080	3154	3265	3434	0
	127	0	1196	2165	2952	3150	3377	0	2784
	128	866	1202	2205	3193	3156	3397	3369	2709
	129	0	1272	2167	3000	3151	3385	3407	0
	130	905	1230	2199	3129	3212	3501	3371	2663
	131	0	1244	0	3062	3279	3519	3387	2668
	132	881	1238	2288	0	3274	0	3608	2777
	133	0	1270	2306	3187	0	3462	0	0
	134	911	1259	2303	3099	3352	3554	3410	2741
	135	0	1268	2334	3125	3333	3553	3463	2782
	136	828	1244	2432	3074	3379	3647	3493	2746
	137	0	1280	2407	2946	3352	3641	3512	0
	138	0	1245	2377	3079	3463	3757	3498	2703
	139	807	1280	0	3162	3398	3649	0	2746
	140	0	1273	2351	3015	3230	3704	3532	0
	141	804	1272	2508	3085	3481	0	3521	2719
	142	0	1222	2491	0	3476	3829	3518	2723
	143	821	1217	2435	3052	3467	3793	3648	2851
	144	0	1191	2525	3115	0	3935	0	0
	145	769	1209	2583	3106	3380	3792	3567	2818
	146	0	1204	2640	3168	3462	3895	3529	2874
	147	0	1202	0	3156	3430	3938	3467	2784
	148	785	1107	2597	3196	3529	3967	3647	0
	149	0	1169	2552	3081	3560	4026	3645	2796
	150	766	1162	2639	3080	3512	0	0	2852
	151	0	1138	2656	0	3548	3943	3653	2829
	152	771	1179	2640	3032	3696	4022	3565	0
	153	0	1130	2634	3149	3617	4031	3706	2820
	154	741	1205	2590	3135	3638	4015	3621	2759
	155	0	1095	0	3083	0	4069	0	0
	156	0	1097	2616	3174	3668	4094	3585	2858
	157	680	1060	2783	3183	3728	4068	3572	2933
	158	0	1098	2715	3125	3558	0	3634	2864
	159	694	1096	2778	3241	3600	4064	3561	0
	160	0	1036	2713	3135	3633	3979	3726	2867
	161	712	1065	2753	0	3651	3925	0	2776
	162	0	1000	0	3104	3615	3991	3520	2743
	163	641	970	2716	3108	3691	4014	3602	0
	164	0	995	2858	3090	3720	4008	3576	2790
	165	0	944	2669	3087	3550	3913	3689	2657
	166	583	972	2744	3148	0	3904	0	0
	167	0	976	2804	3213	3660	0	3643	2682
	168	662	937	2776	3177	3708	3901	3565	2574
	169	0	910	2727	3166	3611	3750	3597	2580
	170	659	876	0	0	3627	3854	3571	0
	171	0	904	2742	3101	3626	3750	3557	2651
	172	599	859	2690	3238	3608	3795	0	2698
	173	0	814	2742	3072	3539	3694	3639	2652
	174	0	787	2787	3189	3572	3516	3454	0
	175	574	826	2702	3227	3535	3522	3641	2672
	176	0	826	2688	3142	3593	0	3552	2572
	177	606	749	2605	3199	3510	3435	3512	2514
	178	0	775	0	3068	0	3370	0	0
	179	548	790	2617	3097	3433	3446	3516	2440
	180	0	708	2675	0	3507	3306	3418	2572
	181	476	739	2685	3005	3547	3276	3545	0
	182	0	725	2639	2912	3400	3264	3420	2401
	183	0	694	2549	2977	3376	3189	0	2346
	184	519	609	2569	3061	3324	3024	3399	2278
	185	0	682	2622	2890	3304	0	3407	0
	186	484	603	0	2890	3104	2934	3430	2295
	187	0	623	2494	2844	3242	2945	3348	2256
	188	491	569	2639	2802	3122	2749	3209	2168
	189	0	566	2550	0	0	2774	0	0
	190	474	537	2510	2783	3031	2660	3231	2169
	191	0	555	2447	2692	3104	2565	3087	2136
	192	0	498	2421	2681	3015	2515	2989	0
	193	436	503	0	2444	2946	2434	2961	2099
	194	0	505	2385	2612	2853	0	0	2034
	195	410	491	2266	2537	2849	2488	2967	1973
	196	0	495	2348	2466	2766	2361	2869	0
	197	436	470	2266	2346	2662	2222	2826	1845
	198	0	456	2214	2401	2549	2239	2738	1885
	199	405	420	2168	0	2605	2181	2719	1796
	200	0	389	2164	2369	0	2085	0	0
	201	0	402	0	2349	2445	1975	2622	1704
	202	372	384	2118	2242	2390	1948	2613	1700
	203	0	436	2060	2148	2330	0	2635	1618
	204	381	371	2018	2174	2328	1848	2417	0
	205	0	400	1979	2113	2216	1844	0	1573
	206	349	392	1964	2036	2146	1790	2320	1499
	207	0	356	1809	1994	2077	1699	2226	0
	208	378	352	1800	0	2006	1606	2194	1457
	209	0	306	0	1828	1933	1670	2167	1424
	210	0	310	1727	1821	1840	1666	1941	1316
	211	358	318	1782	1798	0	0	0	0
	212	0	278	1702	1651	1791	1503	2034	1206
	213	336	294	1645	1644	1654	1435	1884	1163
	214	0	255	1544	1508	1646	1388	1803	1137
	215	306	279	1503	1513	1658	1360	1709	0
	216	0	287	1434	1480	1470	1309	1687	1112
	217	297	258	0	1465	1411	1272	0	1005
	218	0	232	1369	0	1357	1252	1616	0
	219	0	258	1434	1378	1292	1139	1530	988
	220	302	243	1365	1295	1290	0	1407	939
	221	0	223	1292	1312	1199	1138	1364	857
	222	273	214	1144	1192	0	1113	0	0
	223	0	203	1100	1214	1161	1014	1287	800
	224	271	198	0	1069	1123	1098	1253	775
	225	0	204	1116	1088	1059	934	1108	782
	226	267	193	1027	1060	1014	988	1104	0
	227	0	167	1013	0	987	986	1023	702
	228	0	193	953	989	916	888	0	609
	229	226	148	935	900	881	0	1010	643
	230	0	161	896	898	778	846	897	0
	231	303	132	809	905	796	864	834	578
	232	0	143	0	891	761	778	782	547
	233	273	152	786	784	0	783	0	0
	234	0	128	797	714	724	742	715	511
	235	251	124	661	716	661	691	767	502
	236	0	105	726	626	615	664	633	439
	237	0	112	655	0	577	609	589	0
	238	235	112	569	670	565	0	568	460
	239	0	106	564	624	545	586	0	391
	240	249	100	0	573	501	606	533	378
	241	0	78	501	528	509	545	488	0
	242	246	78	499	494	451	512	457	318
	243	0	76	492	530	434	528	435	307
	244	243	95	436	451	0	436	0	0
	245	0	82	401	437	417	435	368	272
	246	0	65	348	0	369	386	400	253
	247	217	74	375	376	371	0	327	279
	248	0	54	0	375	352	363	293	0
	249	205	84	311	387	311	357	290	243
	250	0	58	319	317	329	309	0	224
	251	251	68	281	315	256	337	283	222
	252	0	58	258	303	258	296	220	0
	253	218	57	249	274	222	277	234	213
	254	0	64	224	247	236	250	209	185
	255	5641	251	2214	1849	2200	2162	2202	2985

## Sheet: Series32
Bin procedure GFP histone images: Series 32
															Series							slice 1
	Count
	Value	Slice 1	Slice 2	Slice 3	Slice 4	Slice 5	Slice 6	Slice 7	Slice 8	Slice 9					Count	%						Count	%
	0	282	417	1959	1773	2486	137	43	0	0
	1	3778	6271	15760	15575	15446	2644	822	9	1			Background		1734877					Background		181382
	2	5177	8243	13092	11095	9230	3926	1453	36	0
	3	6511	9848	11939	9483	7507	5031	2122	0	8			Interband		1010904	50.0618				Interband		11233	57.3054
	4	7208	10380	10429	8305	6524	5866	0	85	0
	5	0	10291	9225	7084	5633	0	2699	215	33			Low Intensity		890902	44.119				Low Intensity		6465	32.9813
	6	7791	9951	8032	6046	5011	6359	3395	0	0
	7	8134	9430	7004	5335	0	6315	4145	400	58			High Intesity		117508	5.8192				High Intesity		1904	9.71329
	8	7982	8770	6214	4969	4452	6522	0	652	0
	9	8008	0	5645	4402	4310	6305	4510	0	126					2019314	100						19602	100
	10	0	8188	5125	0	4034	6211	4932	971	0
	11	7877	7959	4598	4132	3720	0	5385	1239	265
	12	7282	7444	4276	3536	3392	5990	0	1487	0
	13	7106	7019	3910	3383	3401	5814	5598	0	480												Slice 2
	14	6657	6488	3569	3148	0	5691	5741	1762	0			Summary
	15	0	6135	3290	2748	3300	5434	5584	2051	753		Series		Interband		Low int.		High int.				Count	%
	16	6148	5755	3103	2652	3046	0	0	0	0
	17	5752	5335	2852	2446	2902	5114	5676	2182	1021		4		59		36		4		Background		251571
	18	5335	0	0	2184	2824	4955	5625	2360	0		12		57		38		5
	19	4926	4924	2748	2171	2690	4640	5340	0	1360		14		58		38		4		Interband		67203	51.382
	20	0	4754	2540	1944	2571	4490	0	2552	0		17		50		45		5
	21	4533	4434	2346	0	0	4187	5123	2566	1699		19		54		40		6		Low Intensity		51762	39.5761
	22	4095	4099	2255	1898	2494	0	4844	2752	0		21		48		45		7
	23	3818	3711	2136	1748	2438	4137	4472	0	1991		23		48		46		6		High Intesity		11826	9.04191
	24	3456	3628	2006	1629	2425	3758	0	2807	0		25		47		48		5
	25	3279	3246	1893	1586	2310	3832	4365	2896	2381		32		50		44		6				130791	100
	26	0	3145	1861	1496	2185	3613	4122	0	0		34		45		49		6
	27	2981	2856	1757	1536	2210	0	3975	2994	2563
	28	2803	0	1725	1428	2141	3436	0	3129	0		Mean		51.6		42.9		5.4
	29	2482	2781	1711	1459	0	3339	3757	0	2879		SD		4.75815		4.32319		0.916515				Slice 3
	30	2430	2727	1712	1345	1978	3257	3590	3069	0
	31	0	2592	1592	0	2155	3148	3502	3219	3019												Count	%
	32	2214	2539	1603	1301	2002	3033	3224	3201	0
	33	2060	2371	1652	1365	1948	0	0	0	3293										Background		223533
	34	1955	2297	1559	1357	2035	2932	3087	3332	0
	35	1902	2230	1619	1388	1912	2787	3058	3450	3369										Interband		124866	49.1763
	36	0	2241	0	1317	0	2760	2935	0	0
	37	1785	0	1600	1382	1962	2774	0	3459	3561										Low Intensity		114018	44.904
	38	1768	2161	1668	1321	1860	0	2769	3466	0
	39	1583	2149	1671	1326	1958	2674	2778	0	3748										High Intesity		15031	5.9197
	40	1607	2068	1605	1414	1945	2586	2614	3320	0
	41	0	2087	1664	1369	1915	2480	0	3319	3798												253915	100
	42	1489	1975	1709	0	2007	2424	2626	3320	0
	43	1435	1997	1709	1453	0	2456	2530	0	3877
	44	1450	1965	1752	1406	2083	0	2451	3381	0
	45	1410	1857	1722	1441	2063	2343	0	3327	3950												Slice 4
	46	1327	2000	1693	1426	2092	2320	2329	0	0
	47	0	0	1686	1430	2185	2370	2329	3305	3901												Count	%
	48	1313	1825	1761	1432	2273	2364	2200	3084	0
	49	1225	1841	1720	1439	2282	2291	0	0	3958										Background		187548
	50	1165	1771	1615	1506	2288	0	2083	3103	0
	51	1152	1846	1728	1451	0	2390	2115	3047	3891										Interband		157627	47.4569
	52	0	1802	1641	1485	2305	2241	2070	2968	0
	53	1086	1868	1639	0	2537	2405	0	0	4033										Low Intensity		154986	46.6617
	54	1144	1651	0	1502	2524	2297	2103	2849	0
	55	1027	1733	1589	1489	2506	0	2047	2798	3886										High Intesity		19535	5.88141
	56	1049	0	1566	1472	2638	2375	2019	0	0
	57	0	1744	1592	1478	2638	2352	0	2752	3919												332148	100
	58	964	1648	1588	1546	0	2392	2059	2687	0
	59	911	1639	1497	1560	2660	2390	1978	0	3870
	60	865	1563	1589	1543	2700	2297	1878	2568	0
	61	868	1586	1527	1499	2797	0	0	2630	3803												Slice 5
	62	0	1549	1581	1514	2895	2398	1932	2557	0
	63	857	1514	1545	0	2763	2474	1927	0	3815												Count	%
	64	800	1525	1554	1538	2886	2396	1902	2483	3719
	65	757	1593	1521	1510	0	2376	1883	2378	0										Background		224488
	66	757	0	1519	1503	2942	0	0	0	3686
	67	0	1483	1577	1525	2864	2322	1911	2279	0										Interband		173361	55.7164
	68	737	1534	1504	1528	2944	2437	1933	2290	3582
	69	716	1473	1529	1585	2947	2459	2013	0	0										Low Intensity		120956	38.874
	70	691	1439	1517	1586	2922	2472	0	2292	3451
	71	643	1500	1483	1529	2958	2429	1974	2282	0										High Intesity		16832	5.40963
	72	643	1533	1568	1572	3011	0	1980	2219	3544
	73	0	1516	0	1607	0	2507	1923	0	0												311149	100
	74	595	1472	1482	0	3073	2482	0	2290	3498
	75	558	0	1553	1654	3009	2444	2063	2138	0
	76	553	1512	1518	1692	3036	2467	2018	0	3333												Slice 6
	77	534	1381	1700	1658	3086	0	2036	2060	0
	78	0	1442	1670	1713	3023	2447	0	2029	3179												Count	%
	79	500	1489	1629	1709	3075	2562	2136	0	0
	80	496	1509	1550	1850	0	2506	2078	2103	3327										Background		228337
	81	499	1413	1607	1826	2981	2629	2176	1992	0
	82	461	1419	1658	1815	3143	2646	0	1981	3231										Interband		163807	53.5823
	83	0	1438	1641	1806	3152	0	2193	0	0
	84	441	1378	1709	1847	3155	2589	2272	1943	3171										Low Intensity		126870	41.5
	85	384	0	1684	0	3204	2685	2284	1930	0
	86	432	1361	1656	1981	3186	2556	0	0	3080										High Intesity		15034	4.91772
	87	377	1396	1736	2007	0	2691	2261	1946	0
	88	0	1359	1749	1957	3138	2718	2248	1932	3188												305711	100
	89	360	1352	1743	2085	3062	0	2310	0	0
	90	366	1302	1706	2024	3215	2726	0	1839	3162
	91	364	1378	0	2175	3140	2668	2392	1863	0
	92	332	1321	1808	2066	3188	2857	2370	1846	3259												Slice 7
	93	283	1410	1846	2170	3252	2794	2399	0	0
	94	0	0	1911	2138	3173	0	0	1749	3115												Count	%
	95	275	1365	1914	0	0	2821	2423	1799	0
	96	318	1285	1872	2224	3232	2911	2571	0	3187										Background		185987
	97	276	1339	1866	2271	3267	2802	2516	1685	0
	98	278	1305	1884	2342	3214	2966	2472	1740	3091										Interband		129098	44.9704
	99	0	1283	1952	2350	3280	2879	0	0	0
	100	249	1322	1929	2370	3310	0	2537	1712	3091										Low Intensity		142109	49.5027
	101	257	1231	1902	2353	3225	3003	2578	1645	0
	102	207	1246	1908	2507	0	2974	2602	1640	2999										High Intesity		15866	5.52682
	103	235	1272	1898	2481	3221	2945	0	0	0
	104	0	0	2034	2581	3247	3007	2588	1644	3120												287073	100
	105	237	1191	1975	2548	3151	0	2617	1618	0
	106	213	1213	1956	0	3275	3109	2630	0	3112
	107	218	1223	1930	2515	3208	3062	0	1602	0
	108	216	1246	2028	2683	3126	3133	2549	1563	3159												Slice 8
	109	0	1179	0	2609	0	3137	2634	0	0
	110	215	1128	1958	2714	3246	3165	2560	1580	3086												Count	%
	111	168	1174	1976	2680	3267	0	0	1554	0
	112	205	1162	1979	2711	3212	3194	2559	1611	3083										Background		138172
	113	188	0	2052	2840	3150	3153	2500	0	0
	114	0	1088	2010	2733	3159	3293	2489	1663	3042										Interband		85907	39.7519
	115	190	1150	2089	2639	3260	3186	0	1607	0
	116	175	1087	2045	2736	3232	0	2552	0	3172										Low Intensity		116669	53.9864
	117	167	1127	1939	0	0	3156	2692	1661	0
	118	176	1053	2039	2759	3159	3140	2669	1677	3023										High Intesity		13532	6.26168
	119	162	1078	2065	2799	3125	3110	0	0	0
	120	0	1052	2083	2821	3075	3204	2555	1701	3007												216108	100
	121	148	1033	2035	2804	3102	3276	2564	1609	0
	122	177	999	2035	2900	3060	0	2578	1669	2933
	123	162	0	2185	2790	3148	3195	0	0	0
	124	161	1050	2073	2925	0	3130	2618	1741	2946												Slice 9
	125	0	1027	2170	2869	3016	3226	2719	1755	0
	126	169	1043	2162	2955	3079	3261	2665	0	2886												Count	%
	127	140	955	0	0	2964	0	0	1837	0
	128	140	987	2092	2925	2997	3156	2692	1939	2917										Background		113859
	129	155	1025	2136	2949	2944	3257	2718	0	2833
	130	0	1041	2138	2910	2869	3200	2739	1916	0										Interband		97802	60.0687
	131	139	1041	2179	2880	0	3201	2654	1973	2917
	132	142	0	2195	2968	3003	3160	0	0	0										Low Intensity		57067	35.0498
	133	130	948	2274	3026	2836	0	2583	2006	2777
	134	138	1002	2236	2992	2789	3169	2789	1978	0										High Intesity		7948	4.88155
	135	0	992	2154	2939	2828	3113	2732	2098	2806
	136	149	1045	2158	2917	2905	3101	0	0	0												162817	100
	137	134	1002	2103	2921	2810	3072	2671	2074	2728
	138	145	956	2260	0	0	3189	2711	2134	0
	139	127	1001	2217	2879	2751	0	2735	0	2791
	140	137	906	2180	2878	2747	3132	0	2302	0
	141	0	960	2223	2909	2660	3046	2781	2338	2632
	142	140	0	2193	2949	2623	3136	2775	0	0
	143	125	951	2196	2992	2652	3102	2741	2294	2520
	144	147	922	2243	3008	2549	0	0	2306	0
	145	131	980	2239	2912	2506	3044	2782	2403	2535
	146	0	958	0	3070	0	2997	2909	0	0
	147	120	956	2172	2940	2539	3008	2920	2359	2434
	148	113	929	2146	2898	2478	3002	0	2426	0
	149	126	979	2208	0	2512	2977	2810	0	2405
	150	116	915	2188	3034	2542	0	2916	2608	0
	151	0	0	2195	3008	2466	3045	2938	2644	2352
	152	126	983	2217	3023	2375	3022	0	0	0
	153	136	854	2203	2894	0	2836	2920	2538	2243
	154	102	937	2138	2957	2424	2909	2940	2557	0
	155	125	902	2147	3008	2334	0	2958	2784	2231
	156	0	949	2144	3010	2324	2922	0	0	0
	157	134	873	2114	2924	2274	2882	3015	2689	2302
	158	139	901	2103	2904	2390	2881	3010	2811	0
	159	131	943	2155	0	2302	2827	2987	0	2236
	160	120	939	2047	2961	0	2699	3016	2843	0
	161	0	0	2050	2978	2351	0	0	2739	2086
	162	122	928	2063	2973	2282	2802	2960	0	0
	163	109	846	2085	2890	2245	2816	2868	2817	2019
	164	124	907	0	3002	2250	2783	3041	2919	0
	165	118	864	2020	2887	2250	2698	0	2824	1994
	166	115	804	2108	2874	2231	0	2964	0	0
	167	0	858	2034	2843	2254	2723	2980	2812	1885
	168	125	883	2010	2882	0	2722	3054	2893	0
	169	112	879	1889	2920	2188	2624	0	0	1929
	170	131	0	1974	0	2160	2594	3019	2809	0
	171	111	850	1918	2823	2206	2625	2894	2866	1789
	172	0	850	1893	2811	2101	0	2970	0	0
	173	98	857	1937	2904	2156	2596	0	2713	1751
	174	106	843	1962	2812	2100	2540	2965	2775	0
	175	108	835	1927	2787	0	2438	2969	2774	1786
	176	93	800	1778	2656	2202	2408	3058	0	0
	177	0	793	1856	2647	2078	2512	0	2831	1656
	178	112	779	1836	2704	2048	0	2885	2689	0
	179	119	824	1719	2681	2113	2383	3033	0	1616
	180	103	0	1773	2570	2104	2380	2795	2730	0
	181	113	807	1747	0	2001	2297	0	2645	1589
	182	0	803	0	2535	0	2302	2786	0	0
	183	96	739	1713	2553	2000	0	2870	2604	1531
	184	113	850	1733	2529	1894	2200	2787	2457	0
	185	96	788	1759	2339	1940	2307	0	2494	1403
	186	99	787	1695	2418	1948	2102	2794	0	0
	187	126	785	1667	2306	1805	2127	2743	2479	1379
	188	0	752	1676	2272	1898	2077	2593	2454	0
	189	101	0	1613	2225	1912	0	0	0	1440
	190	113	730	1586	2306	0	2099	2723	2452	0
	191	93	746	1606	0	1852	2021	2645	2322	1395
	192	105	725	1529	2231	1877	2034	2507	0	1254
	193	0	736	1492	2209	1799	1947	2447	2180	0
	194	92	772	1451	2155	1723	0	0	2224	1233
	195	105	699	1429	2152	1671	1808	2440	2065	0
	196	107	717	1394	2056	1701	1821	2347	0	1196
	197	104	729	1398	2067	0	1821	2358	2053	0
	198	0	752	1366	2011	1715	1753	0	1962	1105
	199	101	0	1363	1932	1630	1685	2315	0	0
	200	90	680	1327	1832	1607	0	2266	1974	1095
	201	93	697	0	1850	1590	1608	2108	1806	0
	202	106	719	1273	0	1556	1542	0	0	1104
	203	0	668	1265	1883	1539	1507	2116	1842	0
	204	93	733	1254	1848	0	1473	2132	1764	1062
	205	126	656	1191	1776	1498	0	1904	1738	0
	206	98	683	1119	1733	1460	1380	0	0	1017
	207	107	642	1108	1602	1443	1404	1947	1678	0
	208	0	0	1120	1761	1393	1372	1925	1487	970
	209	80	664	1098	1520	1394	1247	1831	0	0
	210	102	657	1063	1559	1286	1265	0	1517	862
	211	110	636	1029	1556	1331	0	1657	1458	0
	212	103	630	969	1510	0	1217	1654	0	843
	213	86	575	963	0	1274	1125	1634	1396	0
	214	0	582	996	1476	1219	1092	0	1271	833
	215	95	632	888	1402	1197	1086	1584	1262	0
	216	88	585	935	1386	1198	1001	1479	0	783
	217	77	525	841	1334	1191	0	1396	1278	0
	218	84	0	866	1310	1104	1025	0	1143	741
	219	0	573	0	1271	0	969	1350	0	0
	220	73	570	765	1262	1075	946	1294	1041	688
	221	86	590	781	1165	1057	900	1243	1037	0
	222	65	515	775	1172	1034	0	0	0	631
	223	78	542	755	0	963	835	1171	979	0
	224	0	516	729	1115	919	831	1098	942	633
	225	93	527	731	1022	855	860	1040	899	0
	226	79	501	694	1095	0	732	1030	0	614
	227	86	0	678	1014	911	819	0	866	0
	228	70	478	640	1008	816	0	930	766	511
	229	0	472	665	1007	838	682	883	0	0
	230	56	463	595	956	803	686	822	749	532
	231	67	426	631	889	733	621	0	733	0
	232	64	462	577	882	701	613	849	0	528
	233	59	418	544	789	731	0	744	700	0
	234	56	423	560	0	0	604	715	633	430
	235	0	413	467	794	704	547	0	606	0
	236	68	399	510	739	617	555	661	0	456
	237	63	0	0	710	629	493	625	555	0
	238	51	399	482	676	579	464	623	508	421
	239	47	360	517	619	556	0	0	0	0
	240	0	367	453	566	571	501	547	465	400
	241	55	334	421	538	0	453	542	454	0
	242	65	346	423	504	531	417	471	0	356
	243	38	281	405	510	503	406	0	466	0
	244	56	312	379	500	488	0	423	422	331
	245	0	303	344	0	444	366	435	405	0
	246	41	0	363	419	387	373	427	0	291
	247	47	274	297	425	368	371	0	361	0
	248	36	265	333	413	0	340	385	336	275
	249	24	276	279	354	366	306	302	0	0
	250	0	251	281	366	322	0	275	331	290
	251	52	261	295	285	311	322	0	301	0
	252	40	204	246	276	302	274	296	0	238
	253	42	221	241	257	287	285	248	299	0
	254	37	216	237	198	248	251	248	264	225
	255	512	2174	1743	1724	2231	2693	2345	2413	2050

## Sheet: Series34
Bin procedure GFP histone images: Series 34
															Series							slice 2
	Count
	Value	Slice 2	Slice 3	Slice 4	Slice 5	Slice 6	Slice 7	Slice 8	Slice 9						Count	%						Count	%
	0	46	146	425	159	258	31	0	0
	1	3449	4922	5348	4798	5634	1013	30	1				Background		1835799					Background		156800
	2	6256	10237	7059	7210	6231	2256	108	0
	3	8137	14244	8054	8017	6346	0	0	15				Interband		830309	44.7455				Interband		46249	38.1366
	4	9052	15914	8613	8065	6202	3196	294	0
	5	9637	15652	9020	0	0	3774	486	84				Low Intensity		907519	48.9064				Low Intensity		61518	50.7273
	6	9367	14896	9038	8014	5951	3827	0	0
	7	0	13613	0	7933	5671	0	705	238				High Intesity		117798	6.34815				High Intesity		13505	11.1361
	8	9311	12104	8883	7642	5403	3818	871	502
	9	8531	0	8265	7177	4976	3690	0	0						1855626	100						121272	100
	10	7725	10840	7824	7101	0	3417	1018	954
	11	6614	9351	6918	0	4602	0	1227	0
	12	5800	8484	6389	6490	4136	3414	0	1456
	13	4935	7638	5579	6071	4034	3283	1424	0				Summary									Slice 3
	14	0	6741	4891	5748	3819	3257	1676	2174			Series		Interband		Low int.		High int.
	15	4156	6206	0	5423	0	0	0	2887													Count	%
	16	3551	5607	4621	5004	3563	3131	2006	0			4		59		36		4
	17	3102	5064	4087	0	3396	3182	2291	3517			12		57		38		5		Background		284151
	18	2723	4660	3613	4622	3361	3235	0	0			14		58		38		4
	19	2369	0	3336	4512	3339	0	2776	4210			17		50		45		5		Interband		80798	47.6637
	20	2153	4351	3147	4402	0	3312	3235	0			19		54		40		6
	21	0	3947	2910	4238	3253	3293	0	4734			21		48		45		7		Low Intensity		76636	45.2084
	22	1937	3666	2809	0	3298	3547	3876	5209			23		48		46		6
	23	1809	3387	0	4154	3327	0	4684	0			25		47		48		5		High Intesity		12083	7.1279
	24	1648	3266	2742	4064	3347	3692	0	5840			32		50		44		6
	25	1568	3053	2657	3858	3509	4011	5234	0			34		45		49		6				169517	100
	26	1469	2944	2570	3894	0	4158	5940	6406
	27	1373	2733	2516	3821	3512	0	0	0			Mean		51.6		42.9		5.4
	28	1329	2631	2586	0	3613	4512	6630	7035			SD		4.75815		4.32319		0.916515
	29	0	0	2647	3564	3633	4747	7153	0													Slice 4
	30	1288	2539	2439	3461	3710	4900	0	7636
	31	1269	2450	0	3381	0	0	7488	8096													Count	%
	32	1215	2431	2466	3201	3776	5118	7862	0
	33	1218	2282	2602	3180	3878	5250	0	8395											Background		231114
	34	1141	2339	2383	0	3949	5327	7881	0
	35	1098	2351	2438	2939	3982	0	7797	8749											Interband		116086	44.1006
	36	0	2366	2502	2827	0	5438	7835	0
	37	1039	2194	2506	2788	3934	5310	0	8747											Low Intensity		128577	48.8459
	38	1025	2149	2434	2722	4076	5336	7506	8646
	39	972	0	0	0	4203	0	7400	0											High Intesity		18567	7.05353
	40	1018	2194	2455	2612	4149	5155	0	8664
	41	975	2205	2401	2563	0	5147	7132	0													263230	100
	42	966	2055	2325	2483	4120	4971	6592	8369
	43	0	2076	2302	2442	4162	0	0	0
	44	971	2101	2436	2410	4133	4775	6443	7858
	45	892	1964	2289	0	4024	4626	6152	7658													Slice 5
	46	859	1961	2303	2470	3985	4436	0	0
	47	923	2053	0	2446	0	0	5868	7130													Count	%
	48	900	1988	2186	2322	3996	4324	5374	0
	49	812	0	2197	2438	3822	4135	0	6626											Background		243199
	50	838	1954	2147	2355	3846	4089	5293	0
	51	0	1908	2107	0	3914	0	5029	6151											Interband		134093	40.6869
	52	806	1918	2068	2424	0	3849	0	5744
	53	829	1860	2020	2315	3896	3869	4655	0											Low Intensity		176299	53.4932
	54	827	1809	2017	2314	3818	3709	4451	5427
	55	799	1851	0	2315	3763	0	0	0											High Intesity		19181	5.81995
	56	825	1815	2004	0	3649	3585	4317	5078
	57	776	1797	2030	2242	0	3461	4168	0													329573	100
	58	0	1694	1916	2305	3640	3289	0	4690
	59	748	0	1935	2339	3421	0	3981	0
	60	749	1686	1874	2246	3382	3262	3889	4557
	61	754	1621	1892	2307	3495	3085	0	4268													Slice 6
	62	783	1715	1848	0	0	3118	3661	0
	63	726	1705	0	2225	3380	0	3573	4107													Count	%
	64	751	1584	1836	2239	3374	2975	0	0
	65	0	1571	1771	2246	3194	2887	3344	3888											Background		257547
	66	728	1515	1786	2296	3261	2861	3191	0
	67	656	1540	1784	2247	0	0	0	3746											Interband		166698	49.7722
	68	729	0	1801	0	3196	2740	3087	3504
	69	709	1458	1723	2200	3083	2704	3084	0											Low Intensity		151773	45.3159
	70	703	1458	1708	2216	3123	2615	0	3399
	71	671	1509	0	2208	3094	0	2844	0											High Intesity		16451	4.91189
	72	652	1448	1743	2215	3038	2567	2857	3220
	73	0	1484	1758	0	0	2575	2750	0													334922	100
	74	637	1447	1742	2175	3074	2463	0	3077
	75	640	1437	1770	2165	3079	0	2596	3034
	76	620	1442	1744	2158	3043	2538	2706	0													Slice 7
	77	644	1369	1763	2194	2877	2425	0	2827
	78	693	0	1753	2192	0	2387	2542	0													Count	%
	79	601	1405	0	0	2978	0	2424	2679
	80	0	1410	1796	2185	2921	2380	0	0											Background		224334
	81	656	1366	1804	2118	2828	2483	2379	2605
	82	622	1380	1763	2092	2867	2374	2422	2580											Interband		130928	42.8424
	83	636	1314	1747	2082	0	0	0	0
	84	624	1345	1714	2293	2847	2450	2377	2423											Low Intensity		158918	52.0013
	85	679	1362	1782	0	2960	2416	2267	0
	86	620	1349	1790	2145	2879	2405	0	2391											High Intesity		15758	5.15635
	87	0	1350	0	2093	2946	0	2204	0
	88	606	0	1775	2188	0	2484	2220	2264													305604	100
	89	689	1335	1776	2214	2922	2365	0	0
	90	665	1301	1825	2190	2925	2493	2193	2211
	91	652	1327	1843	0	2934	0	2191	2113
	92	666	1381	1828	2202	2893	2415	0	0													Slice 8
	93	666	1263	1838	2203	2951	2499	2172	2026
	94	656	1341	1813	2164	0	2454	2084	0													Count	%
	95	0	1306	0	2144	2999	0	0	1899
	96	676	1284	1816	0	2939	2434	2122	0											Background		222237
	97	711	1300	1864	2235	2919	2470	2098	1946
	98	674	0	1862	2181	2923	2449	0	1827											Interband		94836	43.3574
	99	715	1327	1912	2312	0	0	2067	0
	100	706	1283	1956	2396	3049	2513	2038	1797											Low Intensity		110655	50.5895
	101	731	1248	1962	2337	2946	2505	0	0
	102	0	1312	1945	0	2978	2514	2080	1785											High Intesity		13240	6.0531
	103	690	1311	0	2342	2931	0	2057	0
	104	705	1280	1883	2322	0	2449	0	1699													218731	100
	105	752	1269	1923	2404	3018	2510	2006	1697
	106	718	1334	1967	2418	2921	2543	2096	0
	107	702	1314	1916	2292	3083	0	0	1621
	108	780	0	1940	0	3068	2485	2031	0													Slice 9
	109	0	1305	1933	2380	0	2492	1959	1553
	110	737	1350	2010	2427	3037	2421	1987	0													Count	%
	111	710	1317	0	2371	3089	0	0	1606
	112	732	1378	2088	2403	3035	2530	2080	1536											Background		216417
	113	795	1405	2063	0	3112	2511	2195	0
	114	815	1332	2015	2417	0	2495	0	1536											Interband		60621	53.753
	115	790	1487	2021	2478	3111	0	2072	0
	116	826	1412	1973	2342	3157	2603	2073	1563											Low Intensity		43143	38.2551
	117	0	1447	2111	2469	3106	2590	0	0
	118	792	0	2046	2467	3244	2660	2000	1530											High Intesity		9013	7.99188
	119	799	1348	0	0	3226	0	2086	0
	120	842	1309	2123	2508	0	2641	0	1453													112777	100
	121	813	1340	2104	2457	3201	2666	2116	1424
	122	922	1359	2026	2489	3131	2759	2100	0
	123	840	1443	2126	2562	3177	0	0	1391
	124	0	1409	2092	2506	3235	2793	2095	0
	125	855	1354	2189	0	0	2679	2227	1436
	126	886	1413	2143	2582	3236	2753	0	0
	127	902	0	0	2664	3294	0	2222	1432
	128	890	1430	2080	2581	3294	2676	2177	1479
	129	941	1329	2188	2616	3268	2778	0	0
	130	917	1349	2114	0	0	2769	2213	1451
	131	0	1433	2049	2724	3347	0	2184	0
	132	864	1516	2089	2631	3288	2732	0	1386
	133	916	1409	2176	2697	3341	2881	2240	0
	134	916	1452	2130	2675	3315	2885	2190	1444
	135	936	1319	0	2710	0	0	0	1400
	136	929	1502	2076	0	3407	2925	2307	0
	137	1006	0	2133	2737	3370	2931	2280	1327
	138	0	1461	2100	2750	3392	3035	0	0
	139	958	1510	2173	2817	3376	0	2113	1366
	140	1009	1371	2133	2824	3366	3016	2339	0
	141	1028	1414	2145	2844	0	3138	0	1357
	142	1069	1463	2130	0	3481	3083	2167	0
	143	1026	1428	0	2864	3492	0	2255	1326
	144	1014	1376	2100	2922	3403	3109	0	1252
	145	984	1426	2166	3031	3385	3086	2298	0
	146	0	1488	1984	3026	0	3226	2329	1359
	147	1007	0	2145	0	3395	0	2229	0
	148	1064	1478	2235	2965	3356	3212	0	1315
	149	1050	1443	2118	3048	3390	3349	2316	0
	150	1065	1443	2151	3032	3381	3263	2275	1279
	151	1020	1448	0	3089	0	0	0	1286
	152	1053	1447	2073	3030	3518	3251	2372	0
	153	0	1481	2147	0	3334	3294	2368	1310
	154	1030	1381	2162	3173	3397	3153	0	0
	155	954	1384	2224	3140	3328	0	2401	1183
	156	1000	1497	2242	3204	0	3346	2423	0
	157	953	0	2175	3316	3394	3393	0	1236
	158	1042	1450	2150	3336	3211	3395	2490	1210
	159	990	1517	0	0	3394	0	2345	0
	160	0	1461	2185	3264	3313	3463	0	1249
	161	1030	1380	2162	3237	0	3420	2464	0
	162	1031	1360	2181	3310	3340	3450	2480	1212
	163	1020	1371	2140	3291	3260	0	0	0
	164	1026	1417	2245	0	3206	3427	2334	1180
	165	1026	1388	2206	3347	3209	3581	2396	1161
	166	1036	1382	2167	3345	3117	3536	0	0
	167	1003	0	0	3374	0	0	2481	1171
	168	0	1405	2171	3472	3176	3567	2477	0
	169	1007	1428	2147	3371	3275	3616	0	1122
	170	1051	1316	2154	0	3114	3437	2461	0
	171	1040	1319	2314	3263	3056	0	2438	1123
	172	1006	1330	2276	3447	0	3536	0	0
	173	980	1261	2247	3421	2943	3598	2479	1071
	174	1055	1308	2148	3372	2914	3555	2451	1106
	175	0	1357	0	3348	3038	0	0	0
	176	905	1258	2317	0	2967	3559	2555	1131
	177	1024	0	2190	3250	0	3541	2512	0
	178	1050	1301	2188	3323	2813	3484	0	1082
	179	1038	1263	2235	3366	2903	0	2554	0
	180	1009	1242	2250	3254	2791	3339	2512	1085
	181	996	1275	2266	3260	2720	3464	0	1123
	182	0	1268	2191	0	0	3357	2417	0
	183	1024	1215	0	3180	2611	0	2419	1083
	184	1024	1205	2183	3263	2765	3307	2360	0
	185	963	1195	2159	3192	2703	3278	0	1057
	186	972	1144	2150	3230	2599	3182	2432	0
	187	952	0	2230	0	2586	0	2311	1023
	188	1049	1080	2072	3061	0	3153	0	1050
	189	978	1104	2104	3080	2521	3078	2423	0
	190	0	1157	2155	2984	2460	3047	2381	1048
	191	1001	1122	0	3059	2400	0	0	0
	192	993	1103	2143	3040	2326	2932	2303	964
	193	929	1096	2026	0	0	2849	2265	0
	194	976	1025	2075	2888	2328	2866	0	987
	195	977	1073	2034	2974	2319	0	2214	982
	196	894	0	1962	2793	2296	2830	2273	0
	197	0	1057	1945	2760	2211	2668	0	1021
	198	931	1040	1954	2715	0	2596	2191	0
	199	972	966	0	0	2171	0	2185	940
	200	923	1012	1947	2667	2102	2476	0	0
	201	910	968	1901	2572	1994	2386	2119	906
	202	879	919	1768	2489	2018	2302	1978	0
	203	869	885	1813	2552	0	0	0	899
	204	0	874	1862	0	1913	2143	1896	882
	205	898	931	1813	2434	1909	2137	1892	0
	206	852	0	1642	2369	1844	2095	0	855
	207	815	793	0	2224	1753	0	1829	0
	208	827	854	1607	2263	0	2048	1765	827
	209	850	785	1647	2179	1733	1944	0	0
	210	835	793	1578	0	1619	1802	1710	797
	211	798	780	1488	2146	1677	0	1659	767
	212	0	741	1457	2035	1537	1797	0	0
	213	822	791	1452	1956	1576	1719	1577	722
	214	759	693	1485	1895	0	1618	1537	0
	215	731	719	0	1811	1490	0	0	732
	216	736	0	1399	0	1471	1527	1476	0
	217	710	705	1397	1720	1409	1497	1399	684
	218	692	659	1326	1647	1302	1360	0	691
	219	0	630	1285	1571	0	0	1349	0
	220	751	627	1202	1549	1213	1365	1251	664
	221	727	598	1156	0	1141	1283	1180	0
	222	729	579	1201	1566	1160	1156	0	618
	223	680	585	0	1392	1114	0	1188	0
	224	600	552	1137	1360	0	1103	1092	624
	225	626	533	1024	1279	997	1029	0	580
	226	0	0	1010	1146	1036	1023	992	0
	227	607	516	1038	0	960	0	959	524
	228	573	542	982	1131	914	999	0	0
	229	609	462	910	1170	0	899	904	499
	230	600	462	882	1081	932	912	846	0
	231	552	467	0	986	833	0	0	524
	232	503	504	886	940	804	799	766	0
	233	542	391	792	0	742	733	736	454
	234	0	434	747	871	683	725	0	443
	235	515	420	683	830	0	0	682	0
	236	488	0	659	753	661	677	650	424
	237	462	419	632	694	600	634	0	0
	238	444	333	634	0	650	580	639	365
	239	408	319	0	657	537	0	572	0
	240	403	395	584	595	0	570	0	373
	241	0	338	556	613	540	510	496	370
	242	434	322	518	561	465	473	482	0
	243	394	344	467	490	411	0	0	346
	244	364	291	470	0	421	428	462	0
	245	351	299	438	441	0	399	422	317
	246	327	0	380	422	364	398	0	0
	247	306	260	0	406	345	0	384	292
	248	0	266	379	390	306	390	317	266
	249	306	254	351	355	323	346	0	0
	250	270	253	305	0	0	329	330	269
	251	254	245	295	323	290	0	292	0
	252	249	217	289	286	262	303	0	254
	253	251	227	247	240	220	250	278	0
	254	243	223	238	256	232	232	228	267
	255	2424	2347	2171	2265	1923	2120	1803	2446
